1 **Regulation of tensile stress in response to external forces**  
2 **coordinates epithelial cell shape transitions with organ growth and**  
3 **elongation**

4

5 Ramya Balaji <sup>a,b</sup>, Vanessa Weichselberger <sup>a,b,c</sup>, Anne-Kathrin Classen <sup>a,b \*</sup>

6

7 \* corresponding author

8

9 *a Albert-Ludwigs-University Freiburg, Center for Biological Systems Analysis,*  
10 *Habsburgerstr. 49, 79104 Freiburg, Germany*

11 *b Ludwig-Maximilians-University Munich, Faculty of Biology,*  
12 *Grosshaderner Str. 2-4, 82152 Planegg-Martinsried, Germany*

13 *c Spemann Graduate School of Biology and Medicine (SGBM),*  
14 *Albert-Ludwigs-University Freiburg*

15

16 **Abstract**

17 The role of actomyosin contractility at epithelial adherens junctions has been extensively  
18 studied. However, little is known about how external forces are integrated to establish epithelial  
19 cell and organ shape *in vivo*. We use the *Drosophila* follicle epithelium to investigate how  
20 tension at adherens junctions is regulated to integrate external forces arising from changes in  
21 germline size and shape. We find that overall tension in the epithelium decreases despite  
22 pronounced growth of enclosed germline cells, suggesting that the epithelium relaxes to  
23 accommodate growth. However, we find local differences in adherens junction tension  
24 correlate with apposition to germline nurse cells or the oocyte. We demonstrate that medial  
25 Myosin II coupled to corrugating adherens junctions resists nurse cell-derived forces and thus  
26 maintains apical surface areas and cuboidal cell shapes. Furthermore, medial reinforcement  
27 of the apical surface ensures cuboidal-to-columnar cell shape transitions and imposes  
28 circumferential constraints on nurse cells guiding organ elongation. Our study provides insight  
29 into how tension within an adherens junction network integrates growth of a neighbouring  
30 tissue, mediates cell shape transitions and channels growth into organ elongation.

## 31 Introduction

32  
33 Epithelia give rise to the branching surface of lungs, convoluted villi of the gut and the  
34 protective layer of our skin. The diversity in epithelial function is matched by the diversity in  
35 epithelial cell shapes. Squamous, cuboidal and columnar cell shapes arrange in monolayers  
36 or stratify to support the function of the respective tissue. These shapes are determined by  
37 cell-intrinsic mechanical properties and force-generating mechanisms that the interplay  
38 between adhesion and cytoskeleton generates. However, during organogenesis or  
39 homeostatic maintenance, epithelial cells must also integrate forces which arise from growth  
40 or shape changes of neighboring tissues. These external forces can stretch, shear or compress  
41 tissues and alter cell shape. Thus, the balance between cell-intrinsic and external forces  
42 ultimately defines 3D cell shape [1]. The role of actomyosin contractility in bringing about cell-  
43 intrinsic shape changes, such as remodeling in the plane of adherens junctions, is well  
44 documented [2-6]. However, much less is known about how contractility is reinforced to resist  
45 external forces and thereby helps to prevent cell shape deformation. Similarly, little is known  
46 about how contractility is downregulated to mediate relaxation and cell shape transitions in  
47 response to external forces [7-9].

48  
49 We wanted to specifically understand how external forces that stretch an epithelium are  
50 integrated by regulation of contractility at adherens junctions (AJ) and how the resulting tensile  
51 stress at AJs modulates transitions between cuboidal and columnar 3D cell configurations. We  
52 investigate this question in the *Drosophila* egg chamber consisting of a germline and a somatic  
53 follicle epithelium undergoing coordinated morphogenesis demarcated by 14 stages [10]. The  
54 germline consists of 15 'nurse' cells and 1 oocyte, which grow in size until stage 11 when nurse  
55 cells rapidly transfer their cytoplasm to the oocyte during 'nurse cell dumping'. The somatic  
56 follicle epithelium consists of ca. 850 initially cuboidal cells, which completely envelop the  
57 germline. Between stage 8 and 10A, about 50 cells specified by anterior fate patterning  
58 undergo a cuboidal-to-squamous shape transition to overlie the nurse cell cluster. Between  
59 stage 6 and 10A, about 800 posterior cells of main body and posterior terminal fate undergo a  
60 cuboidal-to-columnar shape transition to overlie the growing oocyte [11-13]. The differentiation  
61 of these diverse epithelial shapes contradicts the expectation that the epithelium subject to  
62 growth and expansion of the enclosed germline would accommodate the increase in shared  
63 surface area by uniform flattening. Although squamous cell flattening has been previously  
64 suggested to represent a compliant response to germline growth, cuboidal and columnar  
65 shapes may resist flattening by relatively higher apical stiffness [11]. However, little is known  
66 about how the follicle epithelium regulates its mechanical properties to integrate the growth of  
67 the enclosed germline with these cell shape transitions.

68  
69 As follicle cells change shape in the absence of cell divisions or cell intercalation [10, 14],  
70 coordination of shape transitions within the epithelium can be exclusively attributed to  
71 cytoskeletal remodeling or turn-over of cell adhesion. Specifically, flattening of anterior cells is  
72 promoted by removal of Fasciculin 2 from lateral surfaces [15] and disassembly of E-cadherin  
73 (E-cad) dependent AJs [16]. Cuboidal-to-columnar shape transitions of posterior cells was  
74 thought to be driven by apical constriction [12, 17, 18]. However, an increase in lateral height  
75 driven by cellular growth fully accounts for columnarisation [11]. Several genetic studies  
76 indicate that Actin, non-muscle Myosin II (MyoII), Spectrins and Integrins are essential to  
77 maintain cuboidal and establish columnar cell shapes [19-23]. However, these studies have  
78 not revealed in detail how these components regulate epithelial behavior to integrate germline  
79 surface area expansion with cuboidal-to-columnar cell shape transitions.

80  
81 Throughout all stages, the apical surface of the epithelium faces the interior germline (Fig S1A-  
82 A"). Thus, any change in germline volume must be matched by a change in apical epithelial  
83 area. Apical MyoII has been proposed to withstand forces from germline growth prior to stage  
84 6 and to promote cell divisions to compensate for germline surface growth during early stages  
85 [20]. However, how actomyosin is integrated with expansion of the apical surface after cell  
86 divisions ceased is not known. In contrast, the basal surface of the epithelium is facing the egg  
87 chamber exterior and deposits an ECM. Circumferentially polarized ECM fibrils have been  
88 proposed to cause egg chamber elongation during stage 2-8 by providing an external,  
89 patterned molecular corset channeling growth of the egg chamber in the anterior-posterior  
90 (A/P) axis [24-27]. This basal corset is thought to be supported by polarized Actin filaments  
91 [28] and oscillatory MyoII-driven contraction [29] to ensure organ elongation until stage 10A.  
92 However, the role of the apical surface in organ elongation has only recently received attention  
93 [30]. Here we provide new insight into regulation of AJs length and contractility to mediate  
94 epithelial relaxation during organ growth, to reinforce cuboidal and columnar cell shapes and  
95 to modulate organ shape.

96  
97

## 98 **Results**

99

### 100 **Main body and posterior terminal cell shape correlates with apposition to oocyte or** 101 **nurse cell compartments**

102

103 During stages 5 and 10A, the oocyte increases in size more rapidly than nurse cells (Fig 1A,  
104 E) [11]. As a result, an increasing number of follicle cells that are positioned over nurse cells,

105 come into contact with the oocyte. Specifically, while only a few main body cells identified by  
106 *mirr* expression [13] contact the oocyte before stage 9, all main body cells contact the oocyte  
107 by stage 10A (Fig 1B,B',F). Of note, all posterior terminal cells identified by *pnt* expression [13]  
108 contact the oocyte between stages 7 and 10A (Fig S1B).

109  
110 During stages 5 and 10A, all posterior terminal and main body cells transition from a cuboidal  
111 to a columnar aspect ratio [10, 11]. At each stage, cells in contact with the oocyte were taller  
112 in height and had a reduced apical surface area than follicle cells still contacting nurse cells  
113 (Fig 1C-D'). Thus, posterior terminal and main body cells in contact with the oocyte were  
114 columnar, whereas cells still contacting nurse cells were cuboidal. To account for this contact-  
115 correlated behavior of future columnar cells, we distinguish this population to either be nurse-  
116 cell-contacting cells (NCCs) or oocyte-contacting cells (OCCs) (Fig 1G). A previous study  
117 revealed that all future columnar cells grow equally in volume [11]. Thus, the contact-correlated  
118 differences in 3D cell shape represent a volume-conserved difference in the ratio of apical to  
119 lateral domains .

120  
121 We wanted to understand if known oocyte-derived patterning signals, such as EGF-signaling,  
122 were sufficient to explain contact-dependent differences in NCC and OCC shapes. Expression  
123 of a constitutively active EGF receptor in all follicle cells prevents specification of anterior fates  
124 [13] and thus squamous cell flattening at stage 9 (Fig S1C). However, the height of main body  
125 follicle cells in contact with nurse cells was still smaller than of cells in contact with the oocyte  
126 (Fig S1C). Thus, while ectopic EGF signaling can alter anterior cell fate patterns, it is  
127 insufficient to directly promote columnar shape in main body cells still in contact with nurse  
128 cells (NCCs). Conversely, expression of a dominant-negative EGF receptor in main body  
129 follicle cells is sufficient to prevent formation of dorsal appendages (Fig S1D) [31] but did not  
130 prevent acquisition of columnar shape in main body cells in contact with the oocyte (OCCs)  
131 (Fig S1E,F). Thus, oocyte-derived EGF signaling is required for fate patterning but is neither  
132 sufficient nor necessary to promote the transition of main body follicle cells from cuboidal to  
133 columnar shape once they contact the oocyte.

134  
135 To understand if contact to either oocyte or nurse cells was necessary for the differences in  
136 main body cell shape during stage 9, we analyzed conditions where the oocyte was  
137 mispositioned within the egg chamber [32, 33]. In these egg chambers, OCCs were still taller  
138 in height and had reduced apical areas than their nurse cell-contacting neighbors (Fig 1H-K).  
139 Thus, upon genetically separating acquisition of columnar shape from topological position  
140 within the egg chamber and from patterning by posterior pole cells, we find that cells lacking  
141 anterior fates only acquire columnar shape if in contact with the oocyte, while maintaining  
142 cuboidal shapes when still in contact with nurse cells.

143  
144 **A medial shift of MyoII, emergence of junctional corrugations and remodeling of the**  
145 **Actin cortex reorganize the apical domain**

146  
147 As the follicle cell's apical domain faces the germline, we speculated that nurse cell or oocyte  
148 signals may regulate the apical cortex and AJ network to control changes in apical follicle cell  
149 area and consequently, the shift in cellular aspect ratio from cuboidal to columnar shapes. We  
150 therefore analyzed localization of apical actomyosin and AJ markers between stages 6 and 9  
151 to better understand how cell shape transitions may be regulated during these stages.

152  
153 We found that MyoII-associated markers, such as the active phosphorylated form of the MyoII  
154 regulatory light chain (MRLC-1P) and the MyoII heavy chain (Zip (Zipper)) localized to AJs and  
155 the apical cortex at stage 6. Strikingly, by stage 9, all MyoII markers became depleted from  
156 AJs and medial MyoII enriched in the apical cortex (Fig 2A-D''', Fig S2A,A'). Importantly, all  
157 follicle cells along the anterior-posterior (A/P) axis shifted MyoII to a medial localization by  
158 stage 9 (Fig S2B). Previous studies demonstrate cessation of apical-medial MyoII oscillations  
159 after stage 6 [30], an observation supported by a lack of apical-medial MyoII oscillations with  
160 a reported time period of 3 min in live imaging at stage 9 (Fig S2C). To understand how apical-  
161 medial MyoII may thus act, we visualized the subcellular organization of Actin. Total F-Actin  
162 staining and follicle-cell-specific expression of *utABD-GFP* revealed that apical-medial Actin  
163 filaments in the follicle cell cortex enriched between stages 6 and 9 (Fig 2E-F'', Fig S2D). Of  
164 note, levels of apical Actin filaments were always higher in OCCs, likely reflecting the  
165 differentiation of apical microvilli (Fig S2E) [34]. Importantly, however, Actin unlike MyoII, was  
166 not excluded from junctions; in fact, Actin filaments radiated from cell-cell contacts formed by  
167 AJs. Strikingly, these pronounced changes to actomyosin organization at the apical cortex  
168 coincided with pronounced changes in AJ appearance. Between stages 6 and 9, follicle cell  
169 AJs started to exhibit gaps in E-cad/ $\beta$ -cat continuity and became more corrugated (Fig 2G-G').  
170 We define corrugations as a larger than 1 ratio of the observed junctional length to that of a  
171 straight line between two cellular vertices. Specifically, the surplus junctional length connecting  
172 two cellular vertices compared to that of a straight line tripled between stages 6 and 9 (Fig  
173 2G''). Importantly, an increase in junctional corrugations was exclusively observed at the level  
174 of AJs; basolateral surfaces remained straight (Fig 2H-I''). Both junctional depletion and medial  
175 shift of MyoII, as well as AJ corrugations, could also be observed during live imaging of egg  
176 chambers, excluding processing artifacts as a source for changes in apical-junctional  
177 architecture (Fig S2F-G'). Combined these observations reveal a pronounced reorganization  
178 of the apical-junctional cortex facing the growing germline surface during post-mitotic stages  
179 of egg chamber growth.

180  
181 To better understand how corrugating AJs may interface with apical-medial MyoII, we  
182 performed super-resolution microscopy of the apical cortex at stage 9. Medial Actin filaments  
183 visualized by follicle cell specific expression of *utABD-GFP* interdigitated with medial MyoII  
184 clusters (Fig 2J-L). Multiple examples of long medial MyoII filaments connecting to AJs could  
185 be observed (Fig 2L-N, Fig S2H-J), strongly indicating that the medial actomyosin cortex is  
186 connected to and acting on corrugating AJs. This rearrangement of medial-junctional  
187 architecture between stages 6 and 9 suggested profound alterations to contractile forces acting  
188 on AJs.

189  
190 To specifically understand how tension at AJs may be affected by depletion of junctional MyoII,  
191 we measured recoil velocities upon laser ablation of AJs at stage 6 and stage 9 [35-37].  
192 Strikingly, junctional tension decreased from stage 6 to stage 9 in main body follicle cells  
193 overlying nurse cells at either stage (Fig 2O,O'). This analysis revealed that, despite the  
194 dramatic growth and surface area expansion of the germline, which is expected to impose  
195 strain on the overlying epithelium, AJ tension decreases by stage 9. These observations  
196 suggest that the junctional depletion and medial shift of MyoII coincides with a reduction in AJ  
197 tension despite external forces imposed by germline growth. Strikingly, by stage 11, when  
198 oocyte-contacting cells need to accommodate the rapid increase of the oocyte surface during  
199 nurse cell dumping, junctional tension dropped to almost undetectable levels (Fig 2O).  
200 Combined, these results demonstrate that AJ tension within the closed sheet of the follicle  
201 epithelium is highly regulated. We speculate that junctional depletion of MyoII and increasing  
202 AJ length supports the developmentally coordinated reduction in AJ tension. Reducing AJ  
203 tension would promote relaxation in the plane of the junctional network and allow epithelial  
204 cells to adapt their apical-junctional area to the growing egg chamber surface.

### 205 206 **Levels of E-cad/ $\beta$ -cat, MyoII and junctional tension are higher in NCCs than OCCs**

207  
208 While the depletion of MyoII from AJs and AJ corrugations occurred in all follicle cells between  
209 stages 6 and 9, we observed pronounced differences in levels of AJ and actomyosin  
210 components between different follicle cell populations. Specifically, between stages 6 and 9,  
211 NCCs retained high junctional levels of E-cad and  $\beta$ -cat, whereas levels strongly decreased in  
212 OCCs (Fig 3A,C,C', Fig S3A). In contrast, AJ-associated proteins such as N-cadherin (N-cad)  
213 or Echinoid (Ed) did not specifically decrease in cells contacting the oocyte (Fig S3A). Further,  
214 MRLC and its active form (MRLC-1P) were specifically enriched in the apical-medial domain  
215 of cells positioned over nurse cells between stages 6 and 9 but, like E-cad and  $\beta$ -cat, levels  
216 dropped in OCCs (Fig 3B,D,D', Fig S3B). Follicle cell specific expression of a fluorophore-

217 tagged MRLC verified that the apical domain of follicle cells alone reflected the differences in  
218 fluorescence intensity (Fig 3E-F', Fig S3C). In contrast, levels of basal MyoII were significantly  
219 lower than apical levels (Fig 3F,F'') and spatial patterns of basal MyoII did not correlate with  
220 nurse cell or oocyte contact (Fig S3D). Of note, anterior squamous-fated cells which are also  
221 in contact with nurse cells displayed a reduction in levels of AJ and MyoII components starting  
222 at stage 7/8 (Fig 3A-E). This correlated with apical expansion as a result of flattening, indicating  
223 dilution of apical and junctional proteins over a larger surface as cause for reduced protein  
224 levels. However, in contrast to anterior cells, decreasing levels of AJ and MyoII components in  
225 OCCs cannot be explained by dilution given the relatively smaller apical OCC surface area, if  
226 compared to NCCs. Combined, this suggests that nurse cell contact promotes maintenance of  
227 E-cad,  $\beta$ -cat and MyoII at the apical-junctional domain of NCCs. In agreement with this  
228 conclusion, high levels of apical-junctional E-cad/ $\beta$ -cat and MyoII also correlated with nurse  
229 cell contact in egg chambers containing a mislocalized oocyte (Fig 3G-G'', Fig S3E-F'),  
230 confirming that oocyte and nurse cell contact rather than posterior terminal and main body  
231 patterning *per se* are sufficient to regulate apical-junctional E-cad/ $\beta$ -cat and MyoII levels.

232  
233 To understand if differences in junctional E-cad/ $\beta$ -cat and medial MyoII levels between NCCs  
234 and OCCs correlated with differences in junctional tension, we analyzed vertex recoil velocities  
235 upon laser ablation in NCCs and OCCs at stage 9. Indeed, junctional tension in NCCs was  
236 higher than in OCCs (Fig 3H-H'). Importantly, junctional tension in NCCs was dependent on  
237 MyoII contractility. A RNAi mediated knockdown of the MRLC kinase *Rok* in the epithelium  
238 caused a significant decrease in the measured initial recoil velocities after junctional ablation  
239 at stage 9 (Fig S2G-G''). Thus, high levels of medial MyoII in NCCs likely translate into higher  
240 levels of AJ tension if compared to OCCs. If higher levels of medial MyoII are the source of  
241 higher AJ tension in NCCs, then NCC AJs may be more corrugated than OCC AJs, as NCC  
242 AJs deflect more strongly by punctuate links to a contractile medial cortex. Indeed, we found  
243 that the surplus junctional length between NCC vertices is longer than between OCC vertices.  
244 Our results demonstrate that while overall AJ tension decreases between stage 6 and 9, NCCs  
245 maintain higher levels of AJ tension than OCC. While the overall decrease in AJ tension  
246 correlated with the medial shift of MyoII between stage 6 and 9, the relatively higher AJ tension  
247 in NCCs correlated with the presence of higher levels of medial MyoII and more pronounced  
248 AJ corrugations, if compared to OCCs. Combined, these observations support a model where  
249 medial MyoII controls tension at NCC and OCC AJs.

250  
251  
252  
253



254 **Regulators of actomyosin contractility are required to prevent excessive NCC flattening**

255  
256 Our observations that high levels of medial MyoII, AJ tension and corrugations correlated with  
257 nurse cell contact at stage 9 contradicted expectations about the regulation of cell shape  
258 transition between cuboidal NCCs and columnar OCCs. Intuitively, a reduction in apical  
259 surface area of columnarizing OCCs in response to contact with the growing oocyte is  
260 expected to depend on relatively higher levels of apical-junctional contractility, whereas  
261 relatively larger apical surface areas in cuboidal NCCs in contact with nurse cells could be  
262 associated with reduced apical-junctional contractility.

263  
264 Thus, to understand the functional relevance of higher levels of medial MyoII and junctional  
265 tension in NCCs, we genetically manipulated regulators of actomyosin contractility. Using  
266 RNAi-mediated knock-down driven by TJ-GAL4, a driver displaying highest activity after stage  
267 5, we reduced *Rok* or *sqh* function in the entire epithelium. Strikingly, while OCCs displayed  
268 only minor alterations to cell shape at stage 9, mutant NCCs responded with an expansion of  
269 apical surface area and a reduction in lateral heights (Fig 4A-H', Fig S4A-C'). Apical expansion  
270 of mutant NCCs was not due to loss of cells or multinucleation observed when cells lose MyoII  
271 function in mitotic stages 2 to 5 [20]. In fact, at stage 9, *Rok* RNAi expressing epithelia only  
272 rarely contained binucleate cells and the total number of cells was conserved ( $31.0 \pm 0.3$  and  
273  $30.6 \pm 0.2$  cells in a row along the A/P egg chamber axis in wild type and *Rok* RNAi expressing  
274 egg chambers, respectively, n=5 each). Importantly, the observed increase in apical areas of  
275 NCCs lacking *Rok* or *sqh* function occurred at the expense of corrugation (Fig 4C,D, Fig  
276 S4D,D') supporting the idea that corrugations are maintained by medial MyoII activity tethered  
277 to point contacts at AJs. Combined, these results demonstrate a specific requirement for higher  
278 levels of medial MyoII and AJ tension in maintaining NCC shape by constraining apical NCC  
279 areas and thus preventing flattening. Strikingly, OCCs did not exhibit a similarly strong  
280 requirement for MyoII activity demonstrating that maintenance of apical OCC areas does not  
281 depend on high levels of actomyosin contractility.

282  
283 **Regulators of AJ length are required to prevent excessive NCC flattening**

284  
285 To understand if AJ function also controls the size of apical NCC surfaces between stages 6  
286 and 9, we genetically manipulated core components of AJs. Mosaic analysis of *E-cad* null  
287 clones revealed minimal changes to cell shape, because of compensatory upregulation of N-  
288 cad (data not shown) [38]. We thus expressed  *$\alpha$ -catenin* ( *$\alpha$ -cat*) RNAi in the entire epithelium  
289 or generated  *$\beta$ -cat* mutant mosaic clones. Both approaches eliminate the catenin-mediated  
290 linkage of E-cad or N-cad to Actin and thus AJ formation [5, 6, 39]. Using this strategy, we

291 found that specifically  $\alpha$ -cat and  $\beta$ -cat mutant NCCs but not OCCs flattened with domed apical  
292 membranes by stage 9 (Fig 5A-B',D,E,G,H, Fig S5A-D), demonstrating that AJs are principally  
293 important to mediate the function of high medial MyoII and AJ tension in NCCs.

294  
295 As the elimination of catenin function prevents cell-cell adhesion and therefore the  
296 transmission of forces within the junctional network, we wanted to analyze known regulators  
297 that modulate rather than define AJ function. Strikingly, we found that targeted overexpression  
298 of the AJ regulator Afadin (Canoe (Cno)) [40-42] caused dramatic flattening of NCCs by stage  
299 9 (Fig 5C,C',F,I-K') despite the presence of apical-medial MyoII in *cno*-expressing NCCs (Fig  
300 S5E,F). In contrast to NCCs, *cno*-expressing OCCs maintained their relatively small apical  
301 areas and columnar shape but displayed severe AJ hypercorrugation. Thus, Cno  
302 overexpression lead to an increase in AJ length and suggested that this surplus AJ length  
303 caused apical NCC expansion and cell flattening. Overexpression of a GFP-tagged Cno  
304 revealed that Cno localized with E-cad in vesicle-like structures at AJs (Fig S5G), suggesting  
305 that it modulates E-cad trafficking. Importantly, apical areas of *cno*-expressing NCCs were  
306 larger than those observed in *sqh* RNAi or *Rok* RNAi expressing NCCs (Fig 4G, 5J). This was  
307 not due to reduced follicle cell numbers enveloping the germline surface area ( $31.0 \pm 0.3$  and  
308  $30.4 \pm 0.4$  cells in a row along the A/P egg chamber axis in wild type and *cno*-expressing egg  
309 chambers, respectively, n=5 each). We thus suggest that absolute AJ length defines the  
310 maximum size of an apical NCC area. This maximum possible NCC area is reduced by medial  
311 MyoII to a smaller corrugated surface, whose size depends on a functional ratio between  
312 medial contractility and AJ length.

313  
314 In our search for additional modulators of apical NCC area, and thus cuboidal shape, we found  
315 that targeted overexpression a dominant-negative *Rac1* (*Rac1<sup>DN</sup>*) [43] caused NCCs to flatten  
316 more extensively than OCCs (Fig S5H-I'). Apical expansion of *Rac1<sup>DN</sup>* expressing NCCs was  
317 associated with abnormal tubular AJs protruding into the apical surface, indicating that Rac1  
318 also modulates corrugated AJ architecture (Fig S5I). Moreover, in agreement with coordination  
319 of AJ function by apical polarity determinants [1], we found that reducing levels of the apical  
320 polarity proteins aPKC or Crumbs (Crb) in the epithelium caused pronounced NCC flattening  
321 (Fig S5J-M). Combined these results demonstrate that the maintenance of apical NCC areas,  
322 and thereby of cuboidal shape, relies on the precise regulation of AJ organization and,  
323 importantly, length. In contrast, apical OCC areas and thereby columnar shape did not exhibit  
324 a similarly strong requirement for AJ function, suggesting that NCCs and OCCs exhibit very  
325 different molecular requirements for the maintenance of their apical areas and associated cell  
326 shapes.

327

328 **Maintenance of apical NCC surface area through regulation of AJ length and**  
329 **contractility is required to complete cuboidal-columnar shape transitions**

330  
331 To assess the organ-level consequences of the specific sensitivity of NCCs to deregulation of  
332 MyoII and AJ function, we closely analyzed egg chambers with *sqh* RNAi, *Rok* RNAi, *cno* or  
333 *Rac1<sup>DN</sup>* expressing epithelia. Whereas *sqh* RNAi and *Rok* RNAi expressing chambers  
334 progressed to late stages of development, all *cno* and *Rac1<sup>DN</sup>* expressing egg chambers  
335 degenerated by what at first glance appeared to be stage 9. Specifically, anterior cells had  
336 flattened and main body NCCs were still positioned over nurse cells, indicative of  
337 developmental stage 9. However, we found that chamber sizes were unusually large (Fig S6).  
338 To eliminate that this was just a coincidence in degenerating egg chamber, we analyzed the  
339 size of viable *cno* and also of *Rok* RNAi expressing egg chambers with stage 9 morphologies.  
340 Importantly, the size of their wild type germline was significantly larger than of stage 9 wild type  
341 chambers, and more similar to a size normally observed at stage 10A (Fig 6A-D). To test if the  
342 germline continues to grow by maintaining a nurse cell/oocyte ratio characteristic of stage 9,  
343 or if this ratio also advanced to stage 10A, we measured nurse cell and oocyte sizes. Indeed,  
344 the nurse cell/oocyte ratio in egg chambers with stage 9 *Rok* RNAi or *cno* expressing epithelia  
345 was closer to that of stage 10A wild type egg chambers, demonstrating that oocytes expanded  
346 normally with germline size. Combined, this demonstrates that the development of the  
347 germline continues normally. However, flattening of *cno* and *Rok* RNAi expressing NCCs  
348 expands the total NCC surface anteriorly and beyond the reach of the normally expanding  
349 oocyte (Fig 6F-F’). The severe expansion of *cno*-expressing NCCs ultimately causes a failure  
350 of all main body cells to ever acquire oocyte contact, likely underlying egg chamber  
351 degeneration. In conclusion, maintenance of apical NCC areas is critical to facilitate contact  
352 with the expanding oocyte, and thus to complete cuboidal to columnar cell shape transitions  
353 at stage 9.

354  
355 **Apical-junctional NCC contractility promotes nurse cell cluster elongation**

356  
357 Compared to OCCs, NCCs responded more sensitively to the manipulation of actomyosin and  
358 AJ function by expanding their apical surface areas by stage 9. This implies that contact with  
359 nurse cells drives apical surface area expansion in NCCs. Nurse cells may drive expansion by  
360 coordinating surface growth or surface shape with overlying NCCs. A 1.8-fold increase in nurse  
361 cell surface contributes to germline growth between stage 8 and 10A when cell shape  
362 transitions primarily occur (Kolahi et al, 2009). Thus, the up to 5-fold increase in apical areas  
363 of *cno*-expressing NCCs is not sufficiently accounted for by growth alone.

364

365 We thus asked whether nurse cell shape may also drive apical expansion of mutant NCCs.  
366 Strikingly, apical expansion in *cno* or *Rok* RNAi expressing epithelia coincided with bulging of  
367 individual nurse cells into the apical surface of NCCs at stage 9 (Fig 7A,B). The deformation  
368 of the apical surface furthermore coincided with a significant widening at the dorsal-ventral  
369 (D/V) axis of the nurse cell cluster, concomitant with a shortening of the A/P axis (Fig 7C).  
370 Significant differences in the aspect ratio of total egg chambers containing *cno* or *Rok* RNAi  
371 expressing epithelia was not observed at stages 7 and 8 (Fig S7A). This excludes defects  
372 acquired during rotation-driven axis elongation of egg chambers up to stage 8 as cause of  
373 nurse cell cluster aspect ratio changes at stage 9. Combined, this suggested that apical NCC  
374 surfaces constrain bulging of individual nurse cells and widening of the D/V axis of the entire  
375 nurse cell cluster at stage 9.

376  
377 To provide additional evidence for this idea, we investigated what shape nurse cells acquired  
378 in the complete absence of external constraints. To this end, we enzymatically removed the  
379 basement membrane, thought to contribute to elongated egg chamber shape [24], from stage  
380 10A egg chambers with collagenase. At this stage, nurse cells are only covered by ultrathin  
381 squamous cells, which are not expected to contribute significantly to the combined material  
382 properties of the nurse cell-epithelial cell interface. Indeed, we found that removal of the  
383 basement membrane caused bulging of individual nurse cells and reduction of the nurse cell  
384 cluster aspect ratio to that of a much round shape (Fig 7D,E, Fig S7B). This demonstrates that,  
385 in the absence of external constraints, the default shape of the nurse cell cluster is round rather  
386 than elongated.

387  
388 To test if NCCs compressed the D/V axis of the nurse cell cluster at earlier stages, we  
389 enzymatically removed the basement membrane from stage 9 egg chambers. Here, we  
390 observed nurse cell bulging only at the anterior pole where cells are flat. More importantly,  
391 however, this coincided with circumferential constriction of egg chambers at NCC positions  
392 (Fig 7F). This indicates that NCCs exert circumferential contractility on the nurse cell cluster,  
393 which otherwise would have expanded in D/V into a rounder shape if unconstrained (compare  
394 to Fig 7D). As a consequence of NCCs circumferentially squeezing nurse cells, nurse cells  
395 bulge where external constraints like the basement membrane are removed. To provide  
396 additional evidence for the idea that the nurse cell cluster's D/V axis is constrained by NCCs  
397 contractility, we eliminated NCCs and assessed unconstrained nurse cell shape also at stage  
398 9. RNAi-mediated knockdown of the apical determinant aPKC caused extreme NCC flattening.  
399 Upon additional removal of the basement membrane, we observed pronounced bulging of  
400 nurse cells, which flat mutant NCCs failed to constrain (Fig 7G). Thus, NCCs actively constrain  
401 nurse cell and nurse cell cluster shape at stage 9. Accordingly, nurse cell shape did not change  
402 at all when collagen encapsulating stage 8 egg chambers was removed (Fig S7C),

403 demonstrating that when anterior cells have not flattened yet, the follicle epithelium is sufficient  
404 to constrain nurse cell cluster shape. Combined, our data demonstrates that reinforced  
405 contractility and regulation of AJ length in the apical surface of NCCs suppresses rounding of  
406 individual nurse cells and imposes circumferential constriction on the nurse cell cluster to  
407 ensure elongation during oocyte growth at stage 9 (Fig 7H,H').

408

## 409 **Discussion**

410

### 411 **Regulation of tensile stress in the medial-junctional network**

412 In this study, we investigate how tensile stress within the AJ network of a closed epithelial  
413 sheet integrates growth of a neighbouring tissue, mediates cell shape transitions and channels  
414 growth into organ elongation. Surprisingly, overall AJ tension decreases between stages 6 to  
415 9, despite the expectation that growth of the germline surface stretches and thus increases  
416 tension in the overlying epithelium. Among other possibilities, for example changing expression  
417 of MyoII regulators [44, 45], the observed decrease in AJ tension may arise by a shift to medial  
418 contractility acting at an angle to AJs. Medial contractility acting at an angle to AJs is expected  
419 to reduce the effective force felt by cellular vertices if compared to the same amount of  
420 contractility acting in parallel to AJs. We do not know which signal initiates elaboration of a  
421 medial actomyosin web or the onset of corrugations in AJs. Mechanosensing of germline  
422 growth may provide external cues for medial MyoII and AJ remodelling [46, 47]. However, we  
423 speculate that as AJ tension reduces, external forces can more easily deform the junctional  
424 network to assist total surface area expansion of the epithelium during growth of the germline.  
425 In support of this idea, squamous cell flattening (stage 6-10A) has been suggested to be  
426 mediated by apical relaxation promoting compliance to germline growth [11].

427

428 As has been described for medial MyoII oscillations driving ratchet-like apical constriction [5,  
429 48, 49], we suggest that AJ corrugations arise by deflection of AJs into the medial plane due  
430 to high radial tension at AJs. Indeed, upon loss of *Rok* or *sqh* function, AJ corrugations  
431 disappear as the apical surface expands, demonstrating that medial MyoII constrains apical  
432 areas and maintains corrugations by linking to AJs. Moreover, stronger corrugations in NCCs  
433 than OCCs correlate with higher junctional tension, suggesting that corrugations are not just a  
434 consequence of surplus AJ length surrounding a limited apical surface but that corrugations  
435 arise by active tension imposed on AJs. However, hypercorrugated junctions in *cno*-expressing  
436 OCCs demonstrate that a surplus of junctional material can also promote corrugations.  
437 Importantly, the ratio of absolute junction length to medial contractility appears to regulate the  
438 size of the apical surface. Excessive apical expansion of *cno*-expressing NCCs occurs even  
439 as a contractile machinery is in place to counteract it. In contrast, the relatively smaller surface

440 area expansion upon *Rok* or *sqh* appears limited by regular junctional length. This  
441 interpretation also explains the relatively milder tissue-level phenotypes observed upon *Rok* or  
442 *sqh* LOF, in comparison to *cno*-overexpression.

443  
444 **Modulation of cuboidal cell shape by nurse cell contact**  
445 Despite the overall reduction in AJ tension between stages 6 and 9, we demonstrate that NCCs  
446 locally reinforce AJ contractility at stage 9. Moreover, NCCs respond more sensitively to the  
447 manipulation of actomyosin and AJ function than OCCs, even though main body NCCs and  
448 main body OCCs, specifically, are of the same fate. We thus suggest that MyoII enrichment in  
449 main body NCCs is a local response to resist apical expansion driven by nurse cell rounding  
450 and growth. This ensures that NCCs conserve their apical surface size, and consequently  
451 maintain cuboidal shape and relative position to allow contact with an expanding oocyte. We  
452 expected that the OCCs would display higher junctional tension than NCCs to create the  
453 relatively smaller apical areas characteristic of columnar OCCs or a higher apical stiffness  
454 predicted by [11]. Instead, we found that OCCs display reduced levels of MyoII, junctional  
455 tension and lower sensitivity to the loss of MyoII and AJ function, if compared to NCCs. On  
456 one hand this indicates that the aspect ratio change during columnarisation is not driven by an  
457 increase in OCC AJ contractility relative to NCCs. Thus, columnar shapes do not solely arise  
458 as a consequence of intrinsic contractility at apical or basal cell domains [f.e. 50]. Instead, we  
459 speculate that OCCs may be subject to weaker external forces arising from oocyte growth and  
460 thus acquire the small apical areas associated with columnar shape. Over nurse cells, this  
461 fate-specified columnar shape is stretched into a cuboidal aspect ratio, depending on  
462 differential interactions of the apical epithelial surface with nurse cells and the oocyte. We  
463 speculated that direct adhesion between NCCs and nurse cells could drive apical expansion  
464 during coordinated growth. However, RNAi mediated double-knockdown of N-cad and E-cad  
465 in the germline inhibited the migration of border cells, as previously reported [51], but did not  
466 disrupt epithelial shape transitions (data not shown). Therefore, Cadherin-dependent adhesion  
467 between NCC and nurse cells cannot account for NCC-specific behaviors and future studies  
468 need to address other mechanisms of NCC-nurse cell communication.

469  
470 **Organ elongation by circumferential apical contractility**  
471 Previous studies suggest that elongated egg chamber shape is determined by a molecular  
472 corset at the basal epithelial surface channelling growth of the egg chamber into the A/P axis  
473 [14, 24, 25, 29, 52]. Polarized ECM properties act between stage 2 and 7 [14, 24, 25] and  
474 basal actomyosin contractions ensure egg elongation from mid 9 to 10B [29]. Our study  
475 suggests a mechanism that ensures nurse cell cluster and thus egg chamber elongation during  
476 stages 8 to 9. Our data is consistent with a model where relatively higher levels of apical-  
477 junctional NCC contractility establishes a radially contractile sleeve constraining nurse cell

478 bulging and nurse cell cluster rounding in the D/V egg chamber axis. Accordingly, genetic  
479 reduction of apical-junctional contractility or an increase in AJ length causes nurse cell bulging  
480 and nurse cell cluster rounding while NCCs expand and flatten. Importantly, patterned apical  
481 contractility also shapes the egg chamber prior to stage 6 [30]. Thus, the critical importance of  
482 the apical domain prior to stage 6 and at stages 9 suggests that basal and apical constraints  
483 imposed on egg chamber shape provide alternating mechanisms for egg chamber elongation  
484 at different stages of egg chamber development.

## 485 **Experimental Procedures**

486

### 487 ***Drosophila* stocks and genetics**

488 All experiments were performed on *Drosophila melanogaster*. For detailed genotypes listed for  
489 each figure, please refer to Table S1. Stocks and experimental crosses were maintained on  
490 standard fly food at 18 °C or 25 °C. Mosaic analysis was performed using the FLP/FRT and  
491 the actin-flip-out system [53]. For follicle epithelium clones, FLP expression was induced in  
492 young adult females using a heat shock for 1 h at 37°C. For germline clones, FLP expression  
493 was induced for 1 h at 37°C at 96 h and 120 h after egg lay at 25°C. Flies were fed yeast paste  
494 for 48 to 72 h before dissection.

495

### 496 **Immunohistochemistry and imaging**

497 Ovaries were dissected and fixed in 4% formaldehyde/PBS for 15 min at 22°C. Washes were  
498 performed in PBS + 0.1% Triton X-100 (PBT). Ovaries were incubated with primary antibodies  
499 in PBT overnight at 4°C: guinea-pig anti-Spaghetti-squash 1P (MRLC-1P) (1:400, gift from  
500 Robert Ward), mouse  $\beta$ -catenin (1:100, DSHB, N27A1), rat anti-E-cadherin (1:100, DSHB,  
501 DCAD2), rabbit anti-GFP (1:200, Thermo Fisher, G10362), rat anti-RFP (1:20, gift from H.  
502 Leonhardt, 5F8), Dlg (1:100, DSHB, 4F3), rat anti N-Cad (1:20, DSHB, DN-EXH8), mouse anti-  
503 PKC  $\zeta$  (1:50, Santa Cruz, H-1,sc-17781), mouse  $\beta$ -gal (1:1000, Promega Z378B). Ovaries  
504 were incubated with secondary antibodies (coupled to Alexa Fluorophores, Molecular Probes)  
505 for 2 h at 22 °C. DAPI (0.25 ng/ $\mu$ l, Sigma), Phalloidin (Alexa Fluor 488 and Alexa Fluor 647,  
506 1:100, Molecular Probes, or Phalloidin-TRITC, 1:400, Sigma). Egg chambers were mounted  
507 using Molecular Probes Antifade Reagents. Samples were imaged using Leica TCS SP5, SP8  
508 or ZeissLSM880 confocal microscopes. Samples were processed in parallel and images were  
509 acquired using the same confocal settings, if fluorescence intensities had to be compared.  
510 Super-resolution imaging was performed using an Airyscan detector on a Zeiss LSM880  
511 confocal microscope and images were post-processed with ZEN [54]. Images were processed  
512 and analyzed using FIJI (ImageJ 1.48b) [55].

513

### 514 **Live imaging**

515 Individual ovarioles were dissected out of the muscle sheet and were mounted with a minimal  
516 volume of Schneider's medium supplemented with FBS and insulin as described in [56] on a  
517 standard microscope slide with spacers fashioned from double-sided tape, covered with a  
518 coverslip and sealed with Halocarbon oil. Super-resolution imaging was performed using an  
519 Airyscan detector on a Zeiss LSM880 confocal microscope and post-processed with ZEN [54].  
520 Images were acquired at a 30 s time interval.

521



522 **Collagenase treatment**

523 Individual ovarioles were dissected from the surrounding muscle sheet and were incubated in  
524 Schneider's medium supplemented with 1000 Units/ml collagenase (CLSPA; Worthington  
525 Biochemical Corp) for up to 30 min, rinsed in 1X PBS three times and then fixed and  
526 immunostained individually as described above in an 8-well tissue culture dish.

527  
528 **Laser ablation**  
529 Laser ablation on live egg chambers expressing Shg-GFP [57] were performed on two set ups  
530 – using the inverted microscope set up described previously [36] (Fig 2 and 3) or an inverted  
531 Zeiss Spinning Disc (Yokogawa CSU-22) with a laser ablation unit (Rapp OptoElectronic) (Fig  
532 S3). Briefly, individual ovarioles were dissected out of the muscle sheet and were mounted on  
533 a standard microscope slide with spacers fashioned from double-sided tape, covered with a  
534 coverslip and sealed with Halocarbon oil (Sigma). Experiments were performed on freshly  
535 dissected ovarioles prepared every 20 minutes. 32 pulses/ $\mu\text{m}$  of the laser ( $\lambda=355\text{nm}$ ) at 1000  
536 Hz was applied at a length of 0.22  $\mu\text{m}$  for ablations of cell-cell junctions (Fig 2 and 3). Images  
537 were taken every 0.3 s (Fig S3) or 0.5 s (Fig 2 and 3) for up to 40 s.

538  
539 **Image Analysis and Quantification using FIJI**  
540 All images and movies were analyzed in FIJI (ImageJ 1.48b) [55], unless otherwise stated.  
541 Graphs were generated with Microsoft Excel 365 or R version 3.2.0. Statistical tests were  
542 performed in R 3.2.0. Data sets were checked for normality of distribution with Shapiro's test  
543 and homogeneity of variances by applying Bartlett's or Levene's test. Statistical tests are  
544 indicated in figure legends. The  $\alpha$  value for statistical analysis was set to 0.05 ( $\alpha = 0.05$ ).

545  
546 *Fluorescence intensity quantification*  
547 Measurement of fluorescence intensity traces for junction and cytoskeleton markers (Fig  
548 2,3,S2,S3) were performed using line and profile plot tools in FIJI. The surface occupied by  
549 squamous fated cells was approximated by a line of the same length as which was obtained  
550 for OCCs in the same egg chamber. The remaining segment between 'squamous-fated' and  
551 OCC cells was denoted as NCCs. A fit was applied to the intensities using a smoothing function  
552 in R which automatically chooses a curve fitting method based on the group of the largest size  
553 of data points between squamous fated cells, NCCs or OCCs for each stage. Apical and basal  
554 MRLC intensity in the NCCs was measured in mid sections of egg chambers with the line tool  
555 in FIJI and subtracting the background intensity.

556  
557 *Quantification of apical cell areas, cell heights and AJ corrugations*  
558 Apical areas of epithelial cells were measured at the level of AJs using the polygon tool.  
559 Heights were measured using the line tool in a medial cross-section of the egg chamber.

560 Junctional corrugations (surplus junction length) were quantified by forming a ratio of (1)  
561 junction length obtained by tracing the  $\beta$ -cat signal between two vertices using the segmented  
562 line tool and (2) the distance between the same vertices obtained by using the straight-line  
563 tool. This value would theoretically = 1 when the junction is a straight line and  $>1$  when (1)  $>$   
564 (2).

565  
566 *Analysis of vertex displacement and initial recoil velocities after laser ablation*  
567 To measure vertex displacement after ablation of AJs, a kymograph of the AJs between the  
568 two vertices was generated in FIJI. The vertices of the ablated junction were tracked pre-and  
569 post-ablation and distances between the vertices were obtained for each time point over the  
570 period of recording. For each ablation event, the change in distance between the vertices at  
571 any post-ablation time point relative to the average distance from 10 pre-ablation time points  
572 was obtained. The change in distance was normalized to the average junction length across  
573 all samples within one experimental condition. Finally, the mean relative distance was plotted  
574 as a function of time. In a first approach, a double exponential fit [36, 58] was applied to  
575 estimate the initial velocity of the average curves:  $d(t) = d_1(1 - e^{-t/T_1}) - d_2(e^{-t/T_2} - e^{-t/T_1})$ ,  
576 where  $T_1$  is the slow relaxation time and  $T_2$  is the fast relaxation time of the vertices of ablated  
577 cell bonds.  $d_1$  is the final change of distance between vertices of ablated cell bonds at  $t \rightarrow \infty$   
578 and  $d_2$  is the change in distance due to fast relaxation only. The fit parameters were calculated  
579 and the standard error was determined as shown in Table S3. The fit parameters  $d_1$  and  $T_1$   
580 are poorly estimated for some data sets by:  $d(t) = d_1(1 - e^{-t/T_1}) - d_2(e^{-t/T_2} - e^{-t/T_1})$  (Table  
581 S4). Fast time scale responses are associated with linear elastic behavior of the cytoskeleton  
582 cortex whereas slower ones with viscous behavior. Since,  $T_2$  or fast relaxation time ranges  
583 from 0.3 to 1 s in our measurements and is well estimated, we assume that the recoil of the  
584 vertices in this time interval to be like that of a linear elastic solid and thus the magnitude of  
585 initial velocity is directly proportional to the tension in the junctions. Thus instead of obtaining  
586 the initial velocity  $v_0$  by solving this equation:  $v_0 = d_1/T_1 - d_2(1/T_1 - 1/T_2)$  as described  
587 previously [58], we present initial velocities (Fig 2, 3 and S3) by calculating the slope of the  
588 curve between  $t=0$  and  $t= 0.5$  or  $0.6$  s which is expected to approximately cover the linear  
589 phase of the curves [59].

590  
591 *Aspect ratio measurements of nurse cell compartments and total egg chamber*  
592 Using the line tool in FIJI, the maximum width ( $W$ ) across posterior nurse cells and the  
593 maximum length ( $L$ ) of the nurse cell compartment or the total egg chamber measured from  
594 and to basal surfaces at the maximum width and length in a medial section was measured and  
595 the ratio of length to width was obtained.

596

597 *Germline area and nurse cell-oocyte area ratio measurements*

598 Using the Polygon tool in FIJI, the traces of the nurse cell compartment and oocyte were  
599 generated in the medial section of the egg chambers. Both areas were summed for total  
600 germline area and used as a proxy for volume of egg chamber. Ratio of nurse cell to oocyte  
601 for relative size was obtained.

602

603 **Author Contributions**

604 Conceptualization RB, VW, AKC; Investigation RB, VW, MR, AKC; Writing RB, VW, AKC;  
605 Supervision AKC

606

607 **Acknowledgements**

608 We thank G. Salbreux, S. Grill and the Life Imaging Center (LIC, University of Freiburg) for  
609 discussions and technical help with experiments. We thank R. Ward, Y. Bellaiche, E. Knust,  
610 S. Eaton, U. Tepass, M. Grammont, A. Carmena and H. Leonhardt for sharing reagents. We  
611 thank BDSC, VDRC and DSHB for providing fly stocks and antibodies. We thank the IMPRS-  
612 LS and SGBM graduate schools for supporting our students. Funding for this work was  
613 provided by the DFG (SPP1782).

## 614 **References**

- 615
- 616 1. St Johnston, D. and B. Sanson, *Epithelial polarity and morphogenesis*. Curr Opin Cell  
617 Biol, 2011. **23**(5): p. 540-6.
  - 618 2. Heisenberg, C.P. and Y. Bellaïche, *Forces in tissue morphogenesis and patterning*.  
619 Cell, 2013. **153**(5): p. 948-62.
  - 620 3. Munjal, A. and T. Lecuit, *Actomyosin networks and tissue morphogenesis*.  
621 Development, 2014. **141**(9): p. 1789-93.
  - 622 4. Harris, T.J.C., *Sculpting epithelia with planar polarized actomyosin networks: Principles*  
623 *from Drosophila*. Semin Cell Dev Biol, 2017.
  - 624 5. Roper, K., *Integration of cell-cell adhesion and contractile actomyosin activity during*  
625 *morphogenesis*. Curr Top Dev Biol, 2015. **112**: p. 103-27.
  - 626 6. Takeichi, M., *Dynamic contacts: rearranging adherens junctions to drive epithelial*  
627 *remodelling*. Nat Rev Mol Cell Biol, 2014. **15**(6): p. 397-410.
  - 628 7. Mao, Y., et al., *Differential proliferation rates generate patterns of mechanical tension*  
629 *that orient tissue growth*. EMBO J, 2013. **32**(21): p. 2790-803.
  - 630 8. Legoff, L., H. Rouault, and T. Lecuit, *A global pattern of mechanical stress polarizes*  
631 *cell divisions and cell shape in the growing Drosophila wing disc*. Development, 2013. **140**(19):  
632 p. 4051-9.
  - 633 9. Mao, Y. and B. Baum, *Tug of war--the influence of opposing physical forces on*  
634 *epithelial cell morphology*. Dev Biol, 2015. **401**(1): p. 92-102.
  - 635 10. Duhart, J.C., T.T. Parsons, and L.A. Raftery, *The repertoire of epithelial morphogenesis*  
636 *on display: Progressive elaboration of Drosophila egg structure*. Mech Dev, 2017.
  - 637 11. Kolahi, K.S., et al., *Quantitative analysis of epithelial morphogenesis in Drosophila*  
638 *oogenesis: New insights based on morphometric analysis and mechanical modeling*. Dev Biol,  
639 2009. **331**(2): p. 129-39.
  - 640 12. Horne-Badovinac, S. and D. Bilder, *Mass transit: epithelial morphogenesis in the*  
641 *Drosophila egg chamber*. Dev Dyn, 2005. **232**(3): p. 559-74.
  - 642 13. Xi, R., J.R. McGregor, and D.A. Harrison, *A gradient of JAK pathway activity patterns*  
643 *the anterior-posterior axis of the follicular epithelium*. Dev Cell, 2003. **4**(2): p. 167-77.
  - 644 14. Bilder, D. and S.L. Haigo, *Expanding the morphogenetic repertoire: perspectives from*  
645 *the Drosophila egg*. Dev Cell, 2012. **22**(1): p. 12-23.
  - 646 15. Gomez, J.M., Y. Wang, and V. Riechmann, *Tao controls epithelial morphogenesis by*  
647 *promoting Fasciclin 2 endocytosis*. J Cell Biol, 2012. **199**(7): p. 1131-43.
  - 648 16. Grammont, M., *Adherens junction remodeling by the Notch pathway in Drosophila*  
649 *melanogaster oogenesis*. J Cell Biol, 2007. **177**(1): p. 139-50.

- 650 17. Koch, R.K.a.E., *Studies on the ovarian follicle cells of Drosophila*. Quarterly Journal of  
651 Microscopical Sciences, 1963. **104**(3): p. 297-320.
- 652 18. Wu, X., P.S. Tanwar, and L.A. Raftery, *Drosophila follicle cells: morphogenesis in an*  
653 *eggshell*. Semin Cell Dev Biol, 2008. **19**(3): p. 271-82.
- 654 19. Zarnescu, D.C. and G.H. Thomas, *Apical spectrin is essential for epithelial*  
655 *morphogenesis but not apicobasal polarity in Drosophila*. J Cell Biol, 1999. **146**(5): p. 1075-86.
- 656 20. Wang, Y. and V. Riechmann, *The role of the actomyosin cytoskeleton in coordination*  
657 *of tissue growth during Drosophila oogenesis*. Curr Biol, 2007. **17**(15): p. 1349-55.
- 658 21. Baum, B. and N. Perrimon, *Spatial control of the actin cytoskeleton in Drosophila*  
659 *epithelial cells*. Nat Cell Biol, 2001. **3**(10): p. 883-90.
- 660 22. Conder, R., et al., *The serine/threonine kinase dPak is required for polarized assembly*  
661 *of F-actin bundles and apical-basal polarity in the Drosophila follicular epithelium*. Dev Biol,  
662 2007. **305**(2): p. 470-82.
- 663 23. Ng, B.F., et al., *alpha-Spectrin and integrins act together to regulate actomyosin and*  
664 *columnarization, and to maintain a monolayered follicular epithelium*. Development, 2016.  
665 **143**(8): p. 1388-99.
- 666 24. Crest, J., et al., *Organ sculpting by patterned extracellular matrix stiffness*. Elife, 2017.  
667 **6**.
- 668 25. Haigo, S.L. and D. Bilder, *Global tissue revolutions in a morphogenetic movement*  
669 *controlling elongation*. Science, 2011. **331**(6020): p. 1071-4.
- 670 26. Chen, D.Y., et al., *Symmetry Breaking in an Edgeless Epithelium by Fat2-Regulated*  
671 *Microtubule Polarity*. Cell Rep, 2016. **15**(6): p. 1125-33.
- 672 27. Cetera, M. and S. Horne-Badovinac, *Round and round gets you somewhere: collective*  
673 *cell migration and planar polarity in elongating Drosophila egg chambers*. Curr Opin Genet  
674 Dev, 2015. **32**: p. 10-5.
- 675 28. Cetera, M., et al., *Epithelial rotation promotes the global alignment of contractile actin*  
676 *bundles during Drosophila egg chamber elongation*. Nat Commun, 2014. **5**: p. 5511.
- 677 29. He, L., et al., *Tissue elongation requires oscillating contractions of a basal actomyosin*  
678 *network*. Nat Cell Biol, 2010. **12**(12): p. 1133-42.
- 679 30. Alegot, H., et al., *Jak-Stat pathway induces Drosophila follicle elongation by a gradient*  
680 *of apical contractility*. Elife, 2018. **7**.
- 681 31. Nilson, L.A. and T. Schupbach, *EGF receptor signaling in Drosophila oogenesis*. Curr  
682 Top Dev Biol, 1999. **44**: p. 203-43.
- 683 32. Godt, D. and U. Tepass, *Drosophila oocyte localization is mediated by differential*  
684 *cadherin-based adhesion*. Nature, 1998. **395**(6700): p. 387-91.
- 685 33. Gonzalez-Reyes, A. and D. St Johnston, *The Drosophila AP axis is polarised by the*  
686 *cadherin-mediated positioning of the oocyte*. Development, 1998. **125**(18): p. 3635-44.

- 687 34. Schlichting, K., et al., *Cadherin Cad99C is required for normal microvilli morphology in*  
688 *Drosophila follicle cells*. J Cell Sci, 2006. **119**(Pt 6): p. 1184-95.
- 689 35. Shivakumar, P.C. and P.F. Lenne, *Laser Ablation to Probe the Epithelial Mechanics in*  
690 *Drosophila*. Methods Mol Biol, 2016. **1478**: p. 241-251.
- 691 36. Farhadifar, R., et al., *The influence of cell mechanics, cell-cell interactions, and*  
692 *proliferation on epithelial packing*. Curr Biol, 2007. **17**(24): p. 2095-104.
- 693 37. Sugimura, K., P.F. Lenne, and F. Graner, *Measuring forces and stresses in situ in living*  
694 *tissues*. Development, 2016. **143**(2): p. 186-96.
- 695 38. Loyer, N., et al., *Drosophila E-cadherin is required for the maintenance of ring canals*  
696 *anchoring to mechanically withstand tissue growth*. Proc Natl Acad Sci U S A, 2015. **112**(41):  
697 p. 12717-22.
- 698 39. Brasch, J., et al., *Thinking outside the cell: how cadherins drive adhesion*. Trends Cell  
699 Biol, 2012. **22**(6): p. 299-310.
- 700 40. Mandai, K., et al., *Afadin/AF-6 and canoe: roles in cell adhesion and beyond*. Prog Mol  
701 Biol Transl Sci, 2013. **116**: p. 433-54.
- 702 41. Bonello, T.T., et al., *Rap1 acts via multiple mechanisms to position Canoe and*  
703 *adherens junctions and mediate apical-basal polarity establishment*. Development, 2018.  
704 **145**(2).
- 705 42. Walther, R.F., et al., *Rap1, Canoe and Mbt cooperate with Bazooka to promote zonula*  
706 *adherens assembly in the fly photoreceptor*. J Cell Sci, 2018. **131**(6).
- 707 43. Citi, S., et al., *Epithelial junctions and Rho family GTPases: the zonular signalosome*.  
708 Small GTPases, 2014. **5**(4): p. 1-15.
- 709 44. West, J.J., et al., *An Actomyosin-Arf-GEF Negative Feedback Loop for Tissue*  
710 *Elongation under Stress*. Curr Biol, 2017. **27**(15): p. 2260-2270 e5.
- 711 45. Gutzman, J.H. and H. Sive, *Epithelial relaxation mediated by the myosin phosphatase*  
712 *regulator Mypt1 is required for brain ventricle lumen expansion and hindbrain morphogenesis*.  
713 Development, 2010. **137**(5): p. 795-804.
- 714 46. Chanet, S., et al., *Actomyosin meshwork mechanosensing enables tissue shape to*  
715 *orient cell force*. Nat Commun, 2017. **8**: p. 15014.
- 716 47. Weng, M. and E. Wieschaus, *Myosin-dependent remodeling of adherens junctions*  
717 *protects junctions from Snail-dependent disassembly*. J Cell Biol, 2016. **212**(2): p. 219-29.
- 718 48. Martin, A.C., M. Kaschube, and E.F. Wieschaus, *Pulsed contractions of an actin-*  
719 *myosin network drive apical constriction*. Nature, 2009. **457**(7228): p. 495-9.
- 720 49. Mason, F.M., M. Tworoger, and A.C. Martin, *Apical domain polarization localizes actin-*  
721 *myosin activity to drive ratchet-like apical constriction*. Nat Cell Biol, 2013. **15**(8): p. 926-36.
- 722 50. Widmann, T.J. and C. Dahmann, *Dpp signaling promotes the cuboidal-to-columnar*  
723 *shape transition of Drosophila wing disc epithelia by regulating Rho1*. J Cell Sci, 2009. **122**(Pt  
724 9): p. 1362-73.

- 725 51. Niewiadowska, P., D. Godt, and U. Tepass, *DE-Cadherin is required for intercellular*  
726 *motility during Drosophila oogenesis*. J Cell Biol, 1999. **144**(3): p. 533-47.
- 727 52. Andersen, D. and S. Horne-Badovinac, *Influence of ovarian muscle contraction and*  
728 *oocyte growth on egg chamber elongation in Drosophila*. Development, 2016. **143**(8): p. 1375-  
729 87.
- 730 53. del Valle Rodriguez, A., D. Didiano, and C. Desplan, *Power tools for gene expression*  
731 *and clonal analysis in Drosophila*. Nat Methods, 2011. **9**(1): p. 47-55.
- 732 54. Huff, J., *The Airyscan detector from ZEISS: confocal imaging with improved signal-to-*  
733 *noise ratio and super-resolution*. Nature Methods, 2015. **12**: p. 1205.
- 734 55. Schindelin, J., et al., *Fiji: an open-source platform for biological-image analysis*. Nat  
735 Methods, 2012. **9**(7): p. 676-82.
- 736 56. Prasad, M., et al., *A protocol for culturing Drosophila melanogaster stage 9 egg*  
737 *chambers for live imaging*. Nat Protoc, 2007. **2**(10): p. 2467-73.
- 738 57. Huang, J., et al., *Directed, efficient, and versatile modifications of the Drosophila*  
739 *genome by genomic engineering*. Proc Natl Acad Sci U S A, 2009. **106**(20): p. 8284-9.
- 740 58. Landsberg, K.P., et al., *Increased cell bond tension governs cell sorting at the*  
741 *Drosophila anteroposterior compartment boundary*. Curr Biol, 2009. **19**(22): p. 1950-5.
- 742 59. Mayer, M., et al., *Anisotropies in cortical tension reveal the physical basis of polarizing*  
743 *cortical flows*. Nature, 2010. **467**(7315): p. 617-21.
- 744



745 **Fig 1 Main body and posterior terminal cell shape correlates with apposition to**  
 746 **oocyte or nurse cell compartments**

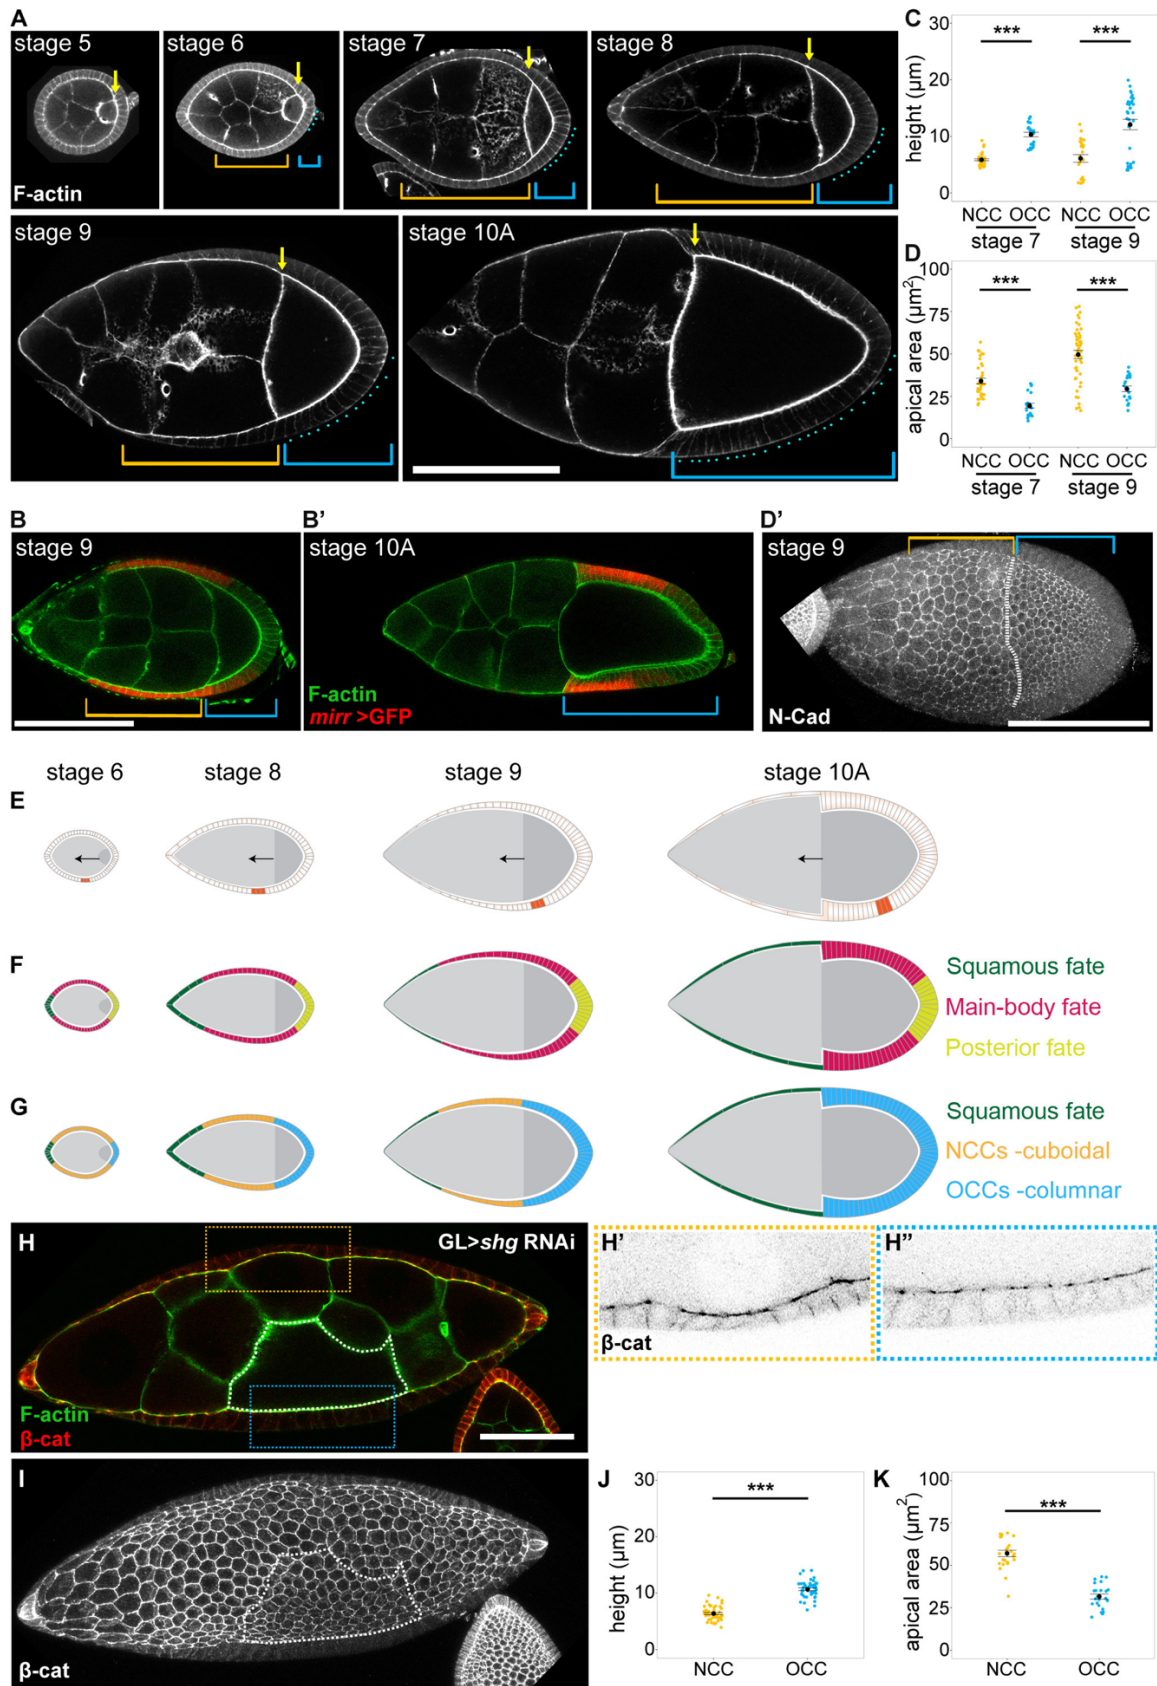

748 **(A)** Medial sections of stage 5 to 10A egg chambers stained for F-actin. Yellow arrows mark  
749 the position of the anterior oocyte boundary. Blue brackets and cyan dots identify columnar  
750 cells in contact with the oocyte called oocyte-contacting cells (OCCs, 4, 8, 10, 13 and 24 cells  
751 from stage 6 to 10A, respectively). Orange brackets identify cuboidal cells in contact with the  
752 nurse cells, which are not of squamous fate and will be called nurse-cell-contacting cells  
753 (NCCs).

754 **(B-B')** Medial sections of stage 9 and 10A egg chambers stained for F-actin (green) and  
755 expressing *UAS GFP* (red) driven by *mirr-Gal4* that is expressed in main-body-fated cells. Note  
756 that at stage 9, cells expressing *mirr-Gal4* are both cuboidal (NCCs, orange bracket) and  
757 columnar (OCCs, blue bracket), whereas by stage 10A all *mirr-Gal4* cells are columnar and  
758 OCCs.

759 **(C-D')** Quantifications of cell heights (C) and apical areas (D) of NCCs and OCCs at stages 7  
760 and 9. Maximum projection of confocal sections of a stage 9 egg chamber to obtain *en face*  
761 view (see Fig S1A') of AJs (D'). The egg chamber was stained for N-Cad to visualize apical  
762 NCC (orange bracket) and OCC (blue bracket) areas (D').

763 **(E-G)** Schemes of medial sections between stages 6 to 10A. 31 cells in a row span each half  
764 from the anterior to the posterior pole. Egg chambers in (E-G) can be superimposed according  
765 to stage. The position of the same three cells (orange, E) are tracked as the oocyte grows  
766 anteriorly (black arrows). The orange cells are initially in contact with nurse cells (stage 6 and  
767 8) and as the oocyte moves anteriorly, they encounter the oocyte (stage 9 and 10A) (E). If  
768 future columnar cells (pink and yellow) are tracked by known developmental fate markers after  
769 stage 6 (F), neither main-body markers (pink, i.e. *mirr*) nor posterior terminal markers (yellow,  
770 i.e. *pnt*) track exclusively with cuboidal or columnar cell shape. Instead, cell shapes track with  
771 germline contact. Future columnar cells are cuboidal when over nurse cells (orange, NCCs),  
772 and columnar only upon contact with the oocyte (blue, OCCs) (G).

773 **(H-K)** Medial sections to visualize cell height (H-H'') and maximum projection for *en face* view  
774 of AJs (I) of a stage 9 egg chamber. The germline (GL) expresses RNAi targeting *E-cad*  
775 (*shotgun*, *shg*) resulting in a mispositioned oocyte. The oocyte was identified by the  
776 pronounced F-actin cortex and is framed by white dotted lines in (H) and (I). The egg chamber  
777 was stained for F-actin (green in H) and  $\beta$ -cat (red in H,H'-I). Orange (NCC) and blue (OCC)  
778 framed regions in (H) are shown at higher magnification in (H',H''), respectively. Note the  
779 differences in height (H',H'') and apical surface area (I) between NCCs and OCCs.  
780 Quantification of cell heights (J) and apical areas (K) of NCCs and OCCs in egg chambers with  
781 a misplaced oocyte.

782 Graphs display mean $\pm$ SEM. A WMW-test (C,D) and t-test (J,K) was performed. \*\*\* indicates  
783 p-value $\leq$ 0.001. For sample sizes, see Table S2.

784 Scale bar (A-D')=100  $\mu$ m, (H-I)=50  $\mu$ m.

785 **Fig 2 A medial shift of MyoII, emergence of junctional corrugations and**  
 786 **remodeling of the Actin cortex reorganize the apical domain**

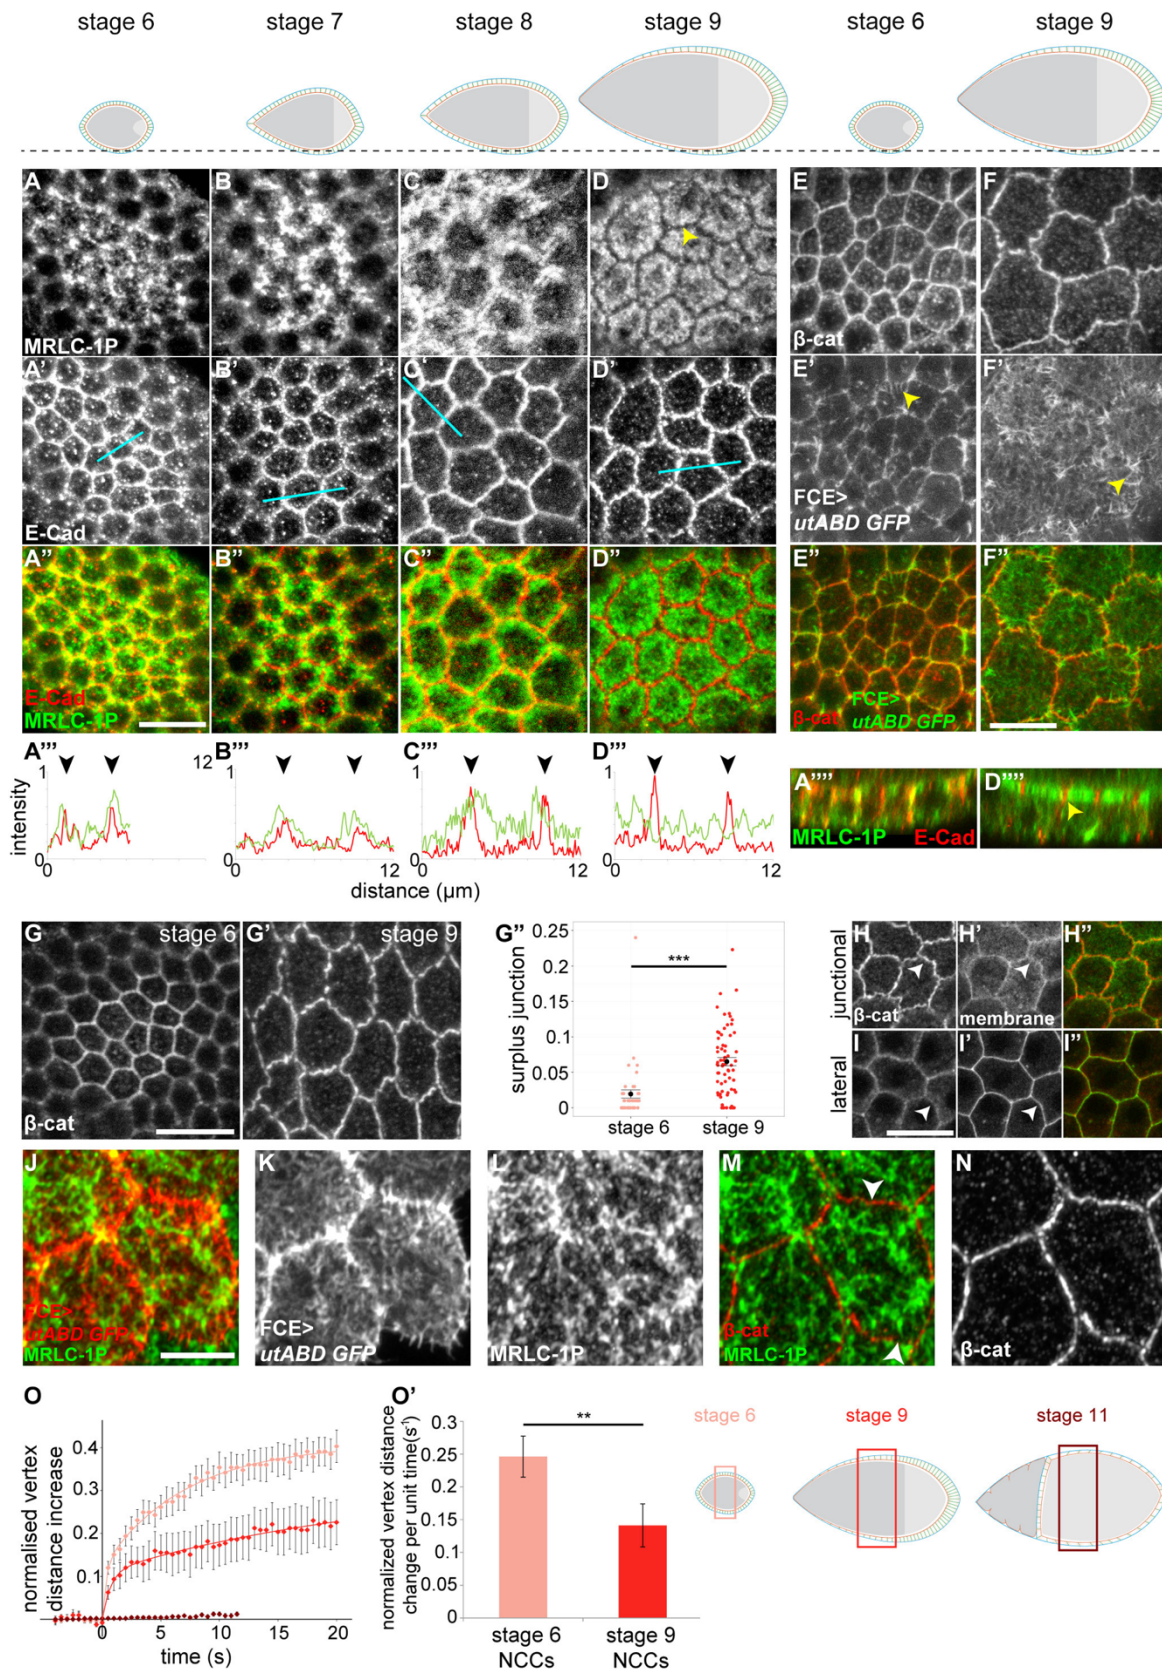

788 **(A-D''')** *En face* AJ sections of egg chambers at stages 6 to 9 (A-D'') stained for MRLC-1P (A-  
789 D, green in A''-D''), E-cad (A'-D', red in A''-D''). Black line across egg chamber schemes  
790 indicates position at which sections were acquired. Line profile plots (A'''-D''') of MRLC-1P  
791 (green) and E-cad (red) fluorescence intensities along cyan lines in (A'-D'). Black arrowheads  
792 point to E-cad intensity peaks at AJs. XZ-reslices of confocal stacks from stage 6 and 9  
793 epithelia (A''''',D''''') shown in A and D. Yellow arrowheads point to depletion of MRLC-1P from  
794 AJs.

795 **(E-F'')** *En face* AJ sections of egg chambers at stages 6 to 9 stained for  $\beta$ -cat (E,F, red in  
796 E'',F''). Actin was visualized by follicle cell specific expression (FCE) of *UAS utABD-GFP* (E',F',  
797 green in E'',F''). Yellow arrowheads indicate Actin filaments positioned at an angle to junctions.

798 **(G-G'')** *En face* AJ sections of NCCs at stage 6 (G) and 9 (G') stained for  $\beta$ -cat. Note the  
799 increase in junctional corrugations. Quantification of surplus junctional length (G'', see Exp.  
800 Proc.). Graphs display mean $\pm$ SEM. n=46 (stage 6) and n=65 (stage 9) junctions at NCC  
801 positions in 3 egg chambers at each stage. WMW-test was performed. \*\*\* indicates p-  
802 value $\leq$ 0.001.

803 **(H-I'')** *En face* sections of NCC AJs (H-H'') and lateral interfaces (I-I'') at stage 9 stained for  $\beta$ -  
804 cat (H,I, red in H'',I'') and the plasma membrane marker PH-GFP (H',I', green in H'',I'').  
805 Arrowheads point to corrugations (H,H') and their absence (I,I').

806 **(J-N)** *en face* super-resolution sections obtained by Airy-scan imaging of NCCs with FCE  
807 expression of *utABD-GFP* (K, red in J), stained for MRLC-1P (L, green in J,M) and  $\beta$ -cat (N,  
808 red in M). Arrowheads (M) point to MRLC-1P and actin filaments radiating from AJs and  
809 connecting to the medial actomyosin cortex.

810 **(O-O')** Graph (O) displays the normalized average increase in distance between vertices upon  
811 laser ablation of AJs (t=0) as a function of time in stage 6 (pink, n=10), stage 9 (red, n=10) and  
812 stage 11 (brown, n=8) egg chambers. Graph displays mean $\pm$ SEM and a double exponential fit  
813 (see Exp. Proc., Table S3,S4). Normalized initial vertex distance change per unit time (O', see  
814 Exp. Proc.) of vertices at stage 6 NCCs and stage 9 NCCs. Graphs display mean $\pm$ SEM. A two-  
815 sample t-test was performed. \*\* indicates p-value $\leq$ 0.01. Egg chamber schemes illustrate  
816 position of follicle cells subject to laser cuts.

817 Scale bars (A-I')=10  $\mu$ m, (J-N)=5  $\mu$ m

818

819

820 **Fig 3 Levels of E-cad/β-cat, MyoII and junctional tension are higher in NCCs than**  
 821 **OCCs**  
 822

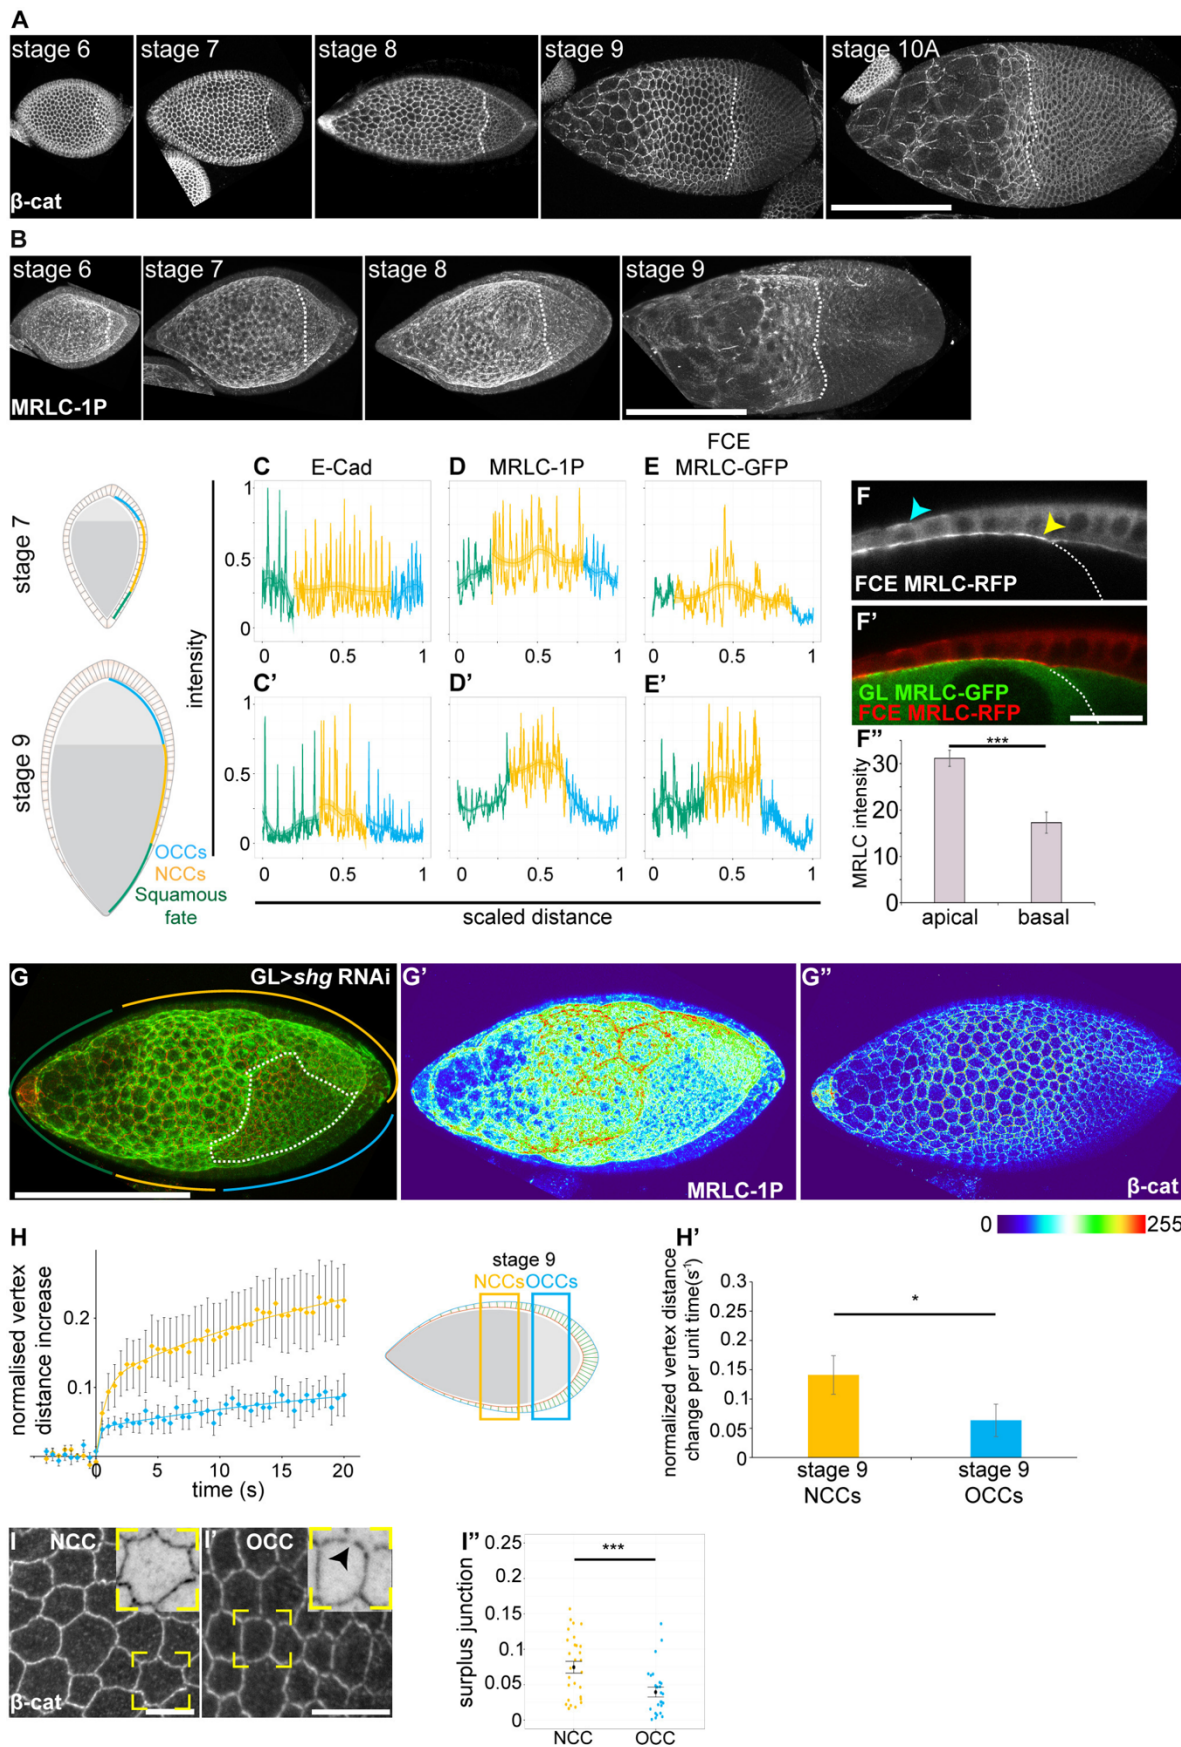

823

824 **(A,B)** Maximum projection of confocal sections to obtain *en face* view of AJs in egg chambers  
825 stained for  $\beta$ -cat and MRLC-1P.

826 **(C-E')** Representative line profiles of fluorescence intensities at apical-junctional domains in  
827 medial sections at stages 7 and 9. Intensities normalized to the maximum measured value  
828 were plotted for squamous cells (green), NCCs (orange) and OCCs (blue) along the length of  
829 an egg chamber scaled from 0-1 (anterior-posterior). Egg chambers were stained for E-cad  
830 (C,C'), MRLC-1P (D,D') and FCE expression of *MRLC-GFP* (E,E'). For each marker,  
831 reproducible line profiles were obtained for  $n \geq 5$  egg chambers. A fitted curve (see Exp. Proc.)  
832 is plotted along with standard error bounds, which aids in seeing intensity trends in different  
833 FCE populations. Note that peak intensities for E-cad coincide with junctions and decrease in  
834 OCCs. Peak intensities of MRLC coincide with junctional and medial positions.

835 **(F-F'')** Medial section of an egg chamber with FCE expression of *MRLC-RFP* (F, red in F') and  
836 germline expression of *MRLC-GFP* (green in F'). Yellow arrowhead points to the sharp drop in  
837 apical MRLC-RFP levels in the FCE at the oocyte boundary. Cyan arrowhead indicates basal  
838 MRLC. Graph displays mean $\pm$ SEM of apical and basal MRLC fluorescence intensity in NCCs  
839 of egg chambers expressing *MRLC-GFP* or *MRLC-RFP* in the FCE only (F'').  $n=5$  egg  
840 chambers. A t-test was performed. \*\*\* indicates  $p\text{-value} \leq 0.001$ .

841 **(G-G'')** Maximum projections of confocal sections to visualize AJs ( $\beta$ -cat, red in G, thermal  
842 LUT in G'') and MRLC-1P (green in G, thermal LUT in G') in a stage 9 egg chamber. The  
843 germline (GL) expresses RNAi targeting *E-cad* (*shotgun*, *shg*) resulting in a mispositioned  
844 oocyte (framed by white dotted lines). Orange (NCC), blue (OCC) and green (squamous-fated)  
845 lines indicate different FCE populations.

846 **(H,H')** Graph (H) displays the normalized average increase in distance between vertices upon  
847 laser ablation of AJs ( $t=0$ ) as a function of time in stage 9 NCCs (orange) or stage 9 OCCs  
848 (blue). Graph (H') shows the normalized initial vertex distance change per unit time (see Exp.  
849 Proc.). Graphs display mean $\pm$ SEM.  $n=9$  each, two-sample t-test was performed. \* indicates  $p$ -  
850 value $\leq 0.05$ . Egg chamber scheme illustrates position of follicle cells subject to laser cuts.

851 **(I-I'')** *En face* junctional sections at stage 9 in NCC (I) and OCC (I') stained for  $\beta$ -cat. Insets  
852 show higher magnifications of yellow squares to visualize discontinuities and corrugations in  
853 AJs (arrowhead). Quantification of surplus junction length in NCCs and OCCs from one  
854 representative egg chamber ( $n=29$  NCCs,  $n=26$  OCCs) (I''). Graphs display mean $\pm$ SEM.  
855 Statistically significant differences were obtained for 3 additional egg chambers (not shown).  
856 A WMW-test was performed. \*\*\* indicates  $p\text{-value} \leq 0.001$ .

857 Scale bars (A,B, G-G'') = 100 $\mu$ m, (F-F'')=20, (I-I'')=10  $\mu$ m

858

859

860 **Fig 4 Regulators of actomyosin contractility are required to prevent excessive**  
 861 **NCC flattening**

862

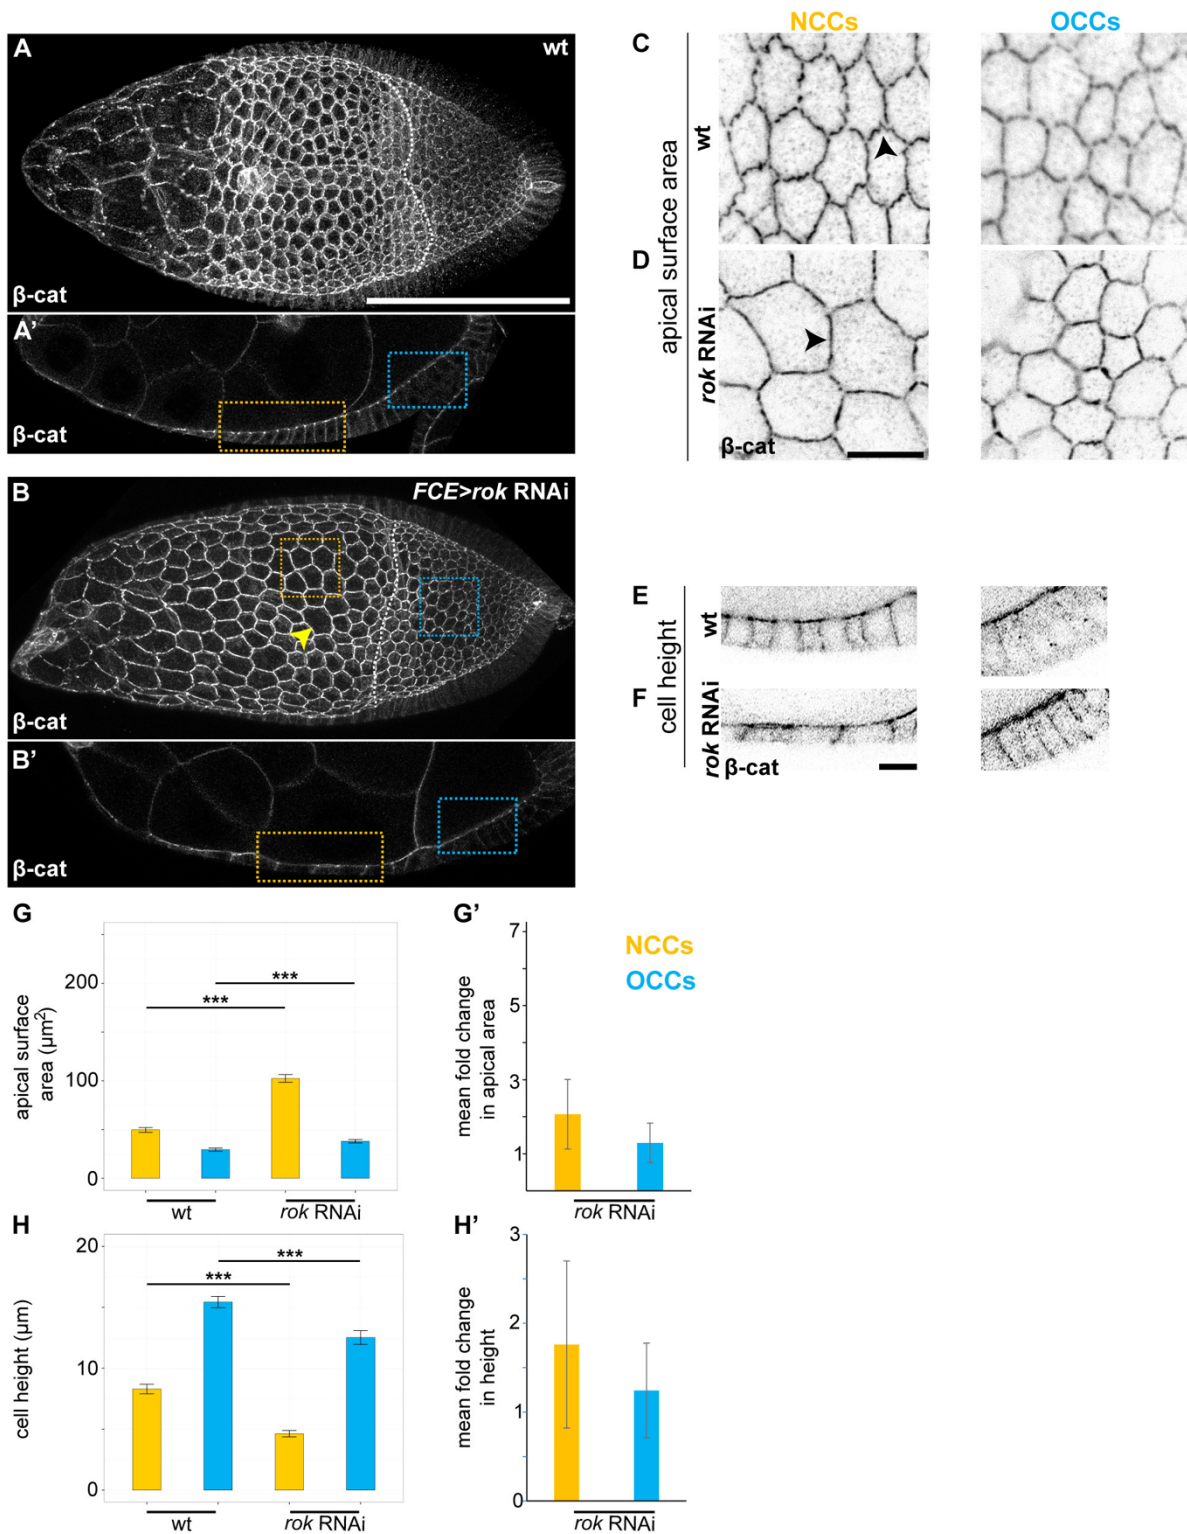

863  
 864 **(A-F)** Maximum projections for *en face* view of AJs (A,B,C,D) and medial sections (A',B',E,F)  
 865 of wild type (wt) egg chambers or one with FCE expression of *rok RNAi* stained for  $\beta$ -cat.  
 866 Yellow (NCC) and blue (OCC) dotted lines (A'-B') frame apical cell areas (C,D) and cell heights

867 1^(E,F). Black arrowheads indicate corrugations in wt (C) and reduced corrugations in *rok*  
868 RNAi (D) NCCs. Yellow arrowhead in (B) points to a multinucleate cell. Such cells were rare  
869 and were excluded from the quantification of cell areas and cell numbers.  
870 **(G-H')** Mean apical areas (G) and cell heights (H)  $\pm$ SEM and the mean fold change relative to  
871 wt in areas (G') or heights (H') with standard errors computed by propagation of error for NCCs  
872 (yellow) and OCCs (blue) upon FCE expression of *rok* RNAi. See Table S2 for sample sizes.  
873 Welch t-tests were performed. \*\*\* indicates p-value $\leq$ 0.001.  
874 Scale bar (A-B')=100 $\mu$ m, (C-F)=10 $\mu$ m



875 **Fig 5 Regulators of AJ length are required to prevent excessive NCC flattening**

876

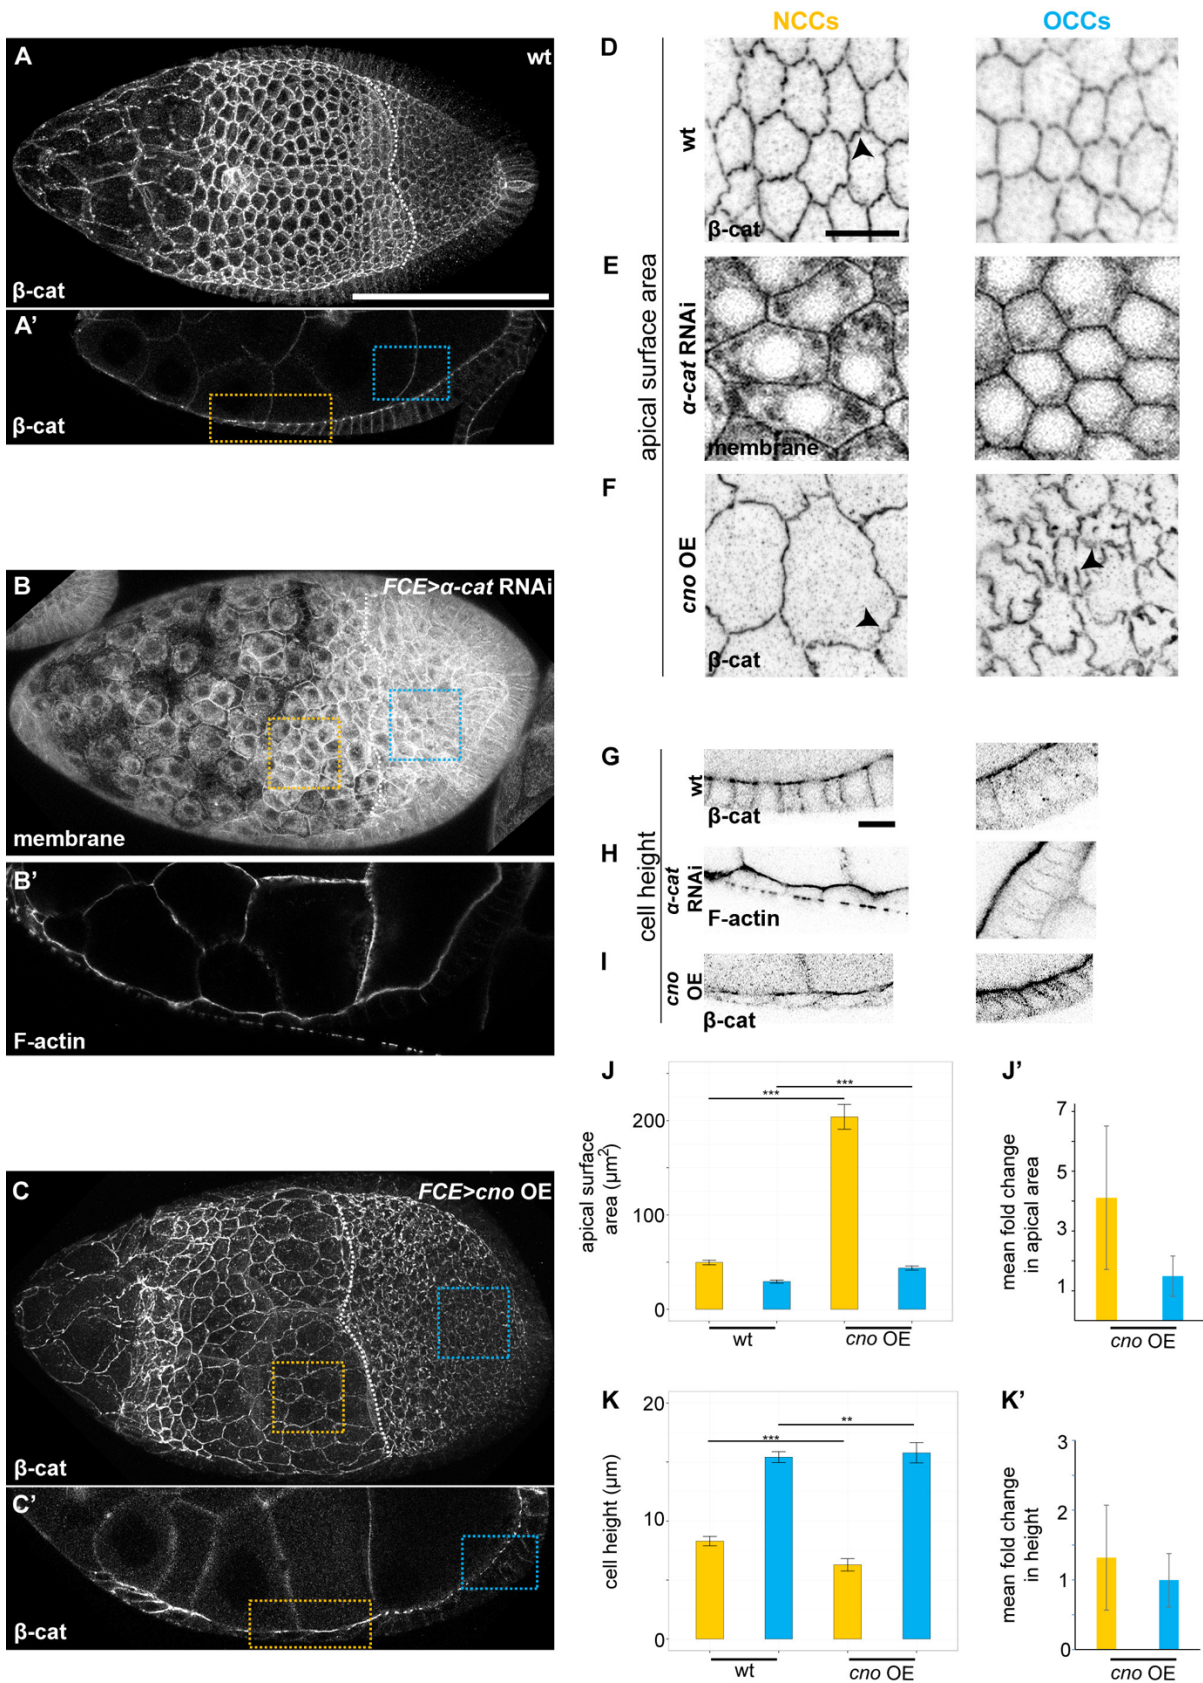

877

878

879 **(A-I)** Maximum projections for *en face* view of AJs (A,B,C,D-F) and medial sections (A',B',C',G-  
880 I) of wt egg chambers or those with FCE expression of  $\alpha$ -cat RNAi or overexpression of *cno*  
881 (OE) stained for  $\beta$ -cat. Yellow (NCC) and blue (OCC) dotted lines (A'-C') frame apical cell  
882 areas (D-F) and cell heights (G-I). Black arrowheads (E,F) indicate corrugations in wt and  
883 hypercorrugations in *cno* OE cells.

884 **(J-K')** Mean apical areas (J), cell heights (K)  $\pm$ SEM and mean fold change relative to wt in  
885 areas (J') or heights (K') with standard errors computed by propagation of error for NCCs  
886 (yellow) and OCCs (blue) upon *cno* overexpression in the epithelium. See Table S2 for sample  
887 sizes. Welch t-tests were performed. \*\*\* indicates p-value $\leq$ 0.001.

888 Scale bar (A-C')=100 $\mu$ m, (D-I)=10 $\mu$ m

889 **Fig 6 Maintenance of NCC cuboidal shape through regulation of AJ length**  
 890 **and contractility is required to complete cuboidal-columnar shape transitions**

891

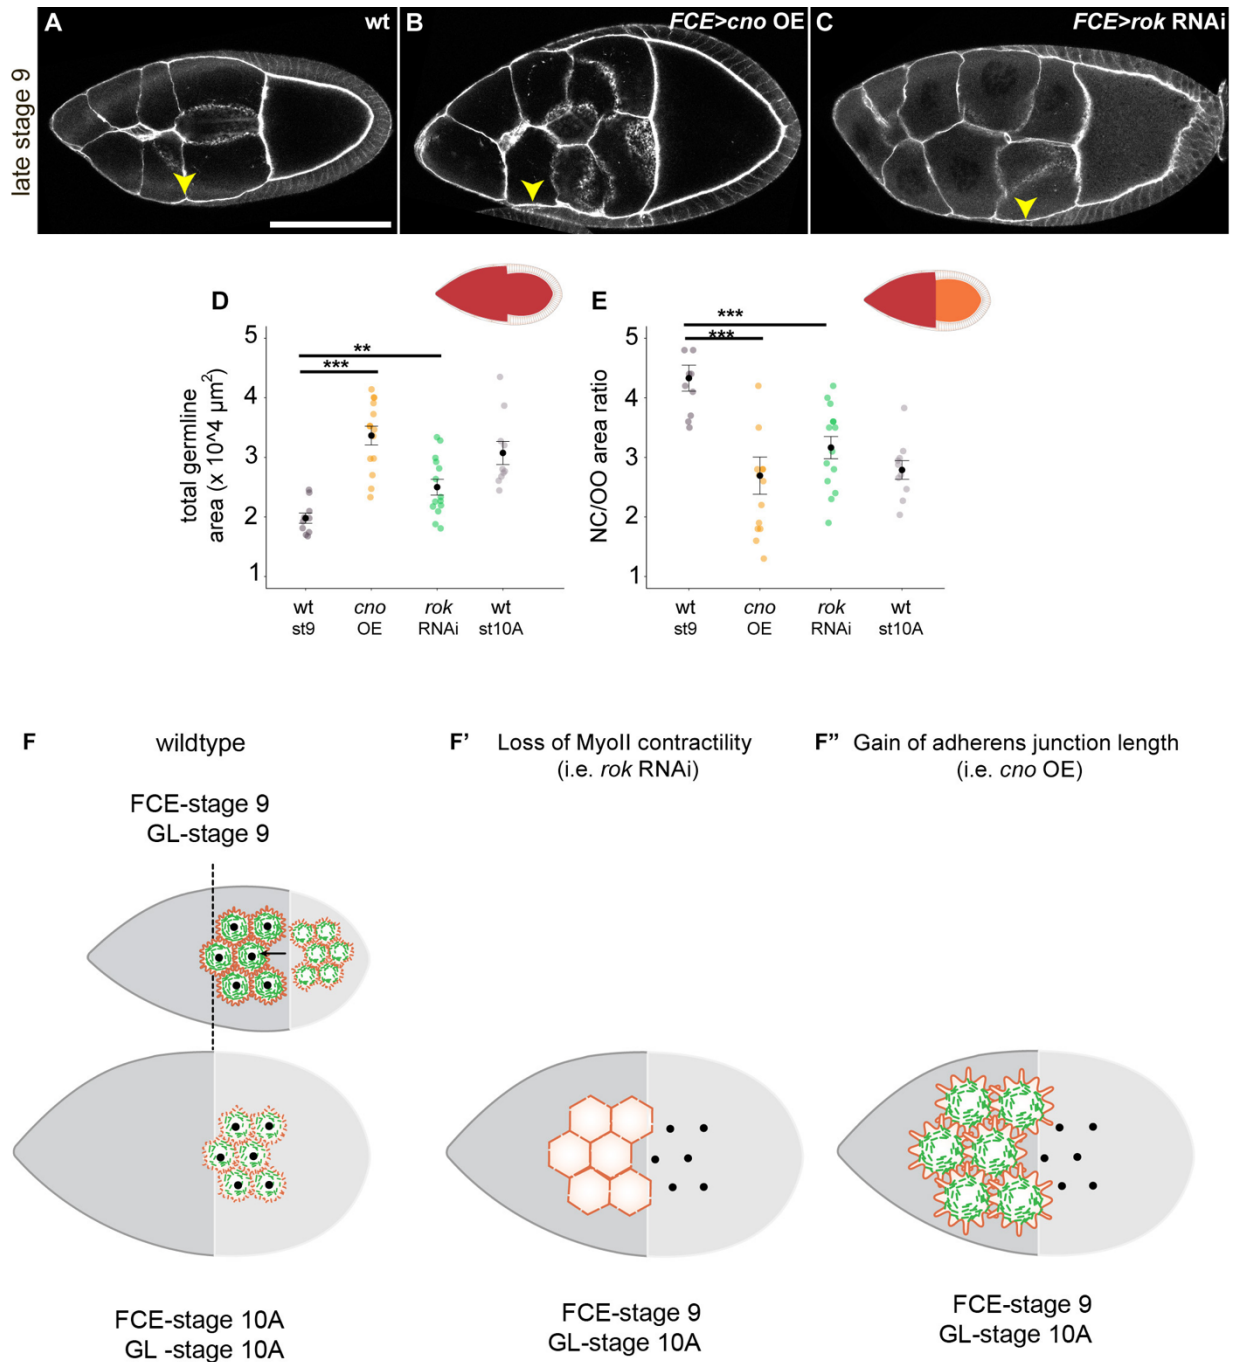

892

893

894 **(A-C)** Medial sections of morphological late stage 9 wt egg chambers (indicated by presence  
 895 of FCE cell shape gradient) (A), or with FCE expression of *cno* (B) or *rok RNAi* (C) stained for  
 896 F-actin and  $\beta$ -cat. Yellow arrowheads point to most anterior NCCs.

897 **(D,E)** Total germline area (D, dark red in scheme) or nurse cell-to-oocyte area ratios (E, ratio  
 898 of dark red to orange area in scheme) were calculated in medial sections of wt egg chambers  
 899 (stage 9 or 10A) or egg chambers with FCE expression of *cno* or *rok RNAi*.  $n \geq 8$  egg chambers

900 for each genotype. Welch t-tests were performed. \*\*\* indicates  $p\text{-value}\leq 0.001$ , \*\* indicates  $p\text{-value}\leq 0.01$

902 **(F-F'')** In a wild type egg chamber, the oocyte grows anteriorly (black arrow) to acquire its  
903 stage 10A size (dotted black line shows where the oocyte boundary will be at stage 10A). Thus,  
904 NCCs at stage 9 become OCCs at stage 10A (see also Fig 1E). Corrugating FCE junctions  
905 are labelled in orange and medial MyoII in green. Black dots label the central position of apical  
906 NCCs surfaces at stage 9 and 10A. Note that their absolute position does not change but the  
907 oocyte expands underneath them. Upon loss of MyoII function in the FCE, NCCs expand and  
908 lose AJ corrugations (F'). Upon gain of AJ length in the FCE, excess junction length promotes  
909 apical NCCs expansion (F''). Apical expansion of mutant NCCs in (F', and F'') displaces their  
910 centre positions anteriorly. The oocyte and the total germline (GL) grow to a stage 10A size  
911 but the FCE remains in contact with nurse cells, characteristic of stage 9. Black dots in F', F''  
912 label where NCCs should have been had they maintained normal apical surface size.  
913 Scale bar (A-C)=100 $\mu\text{m}$

914 **Fig 7 Apical-junctional NCC contractility promotes nurse cell cluster**  
 915 **elongation**

916

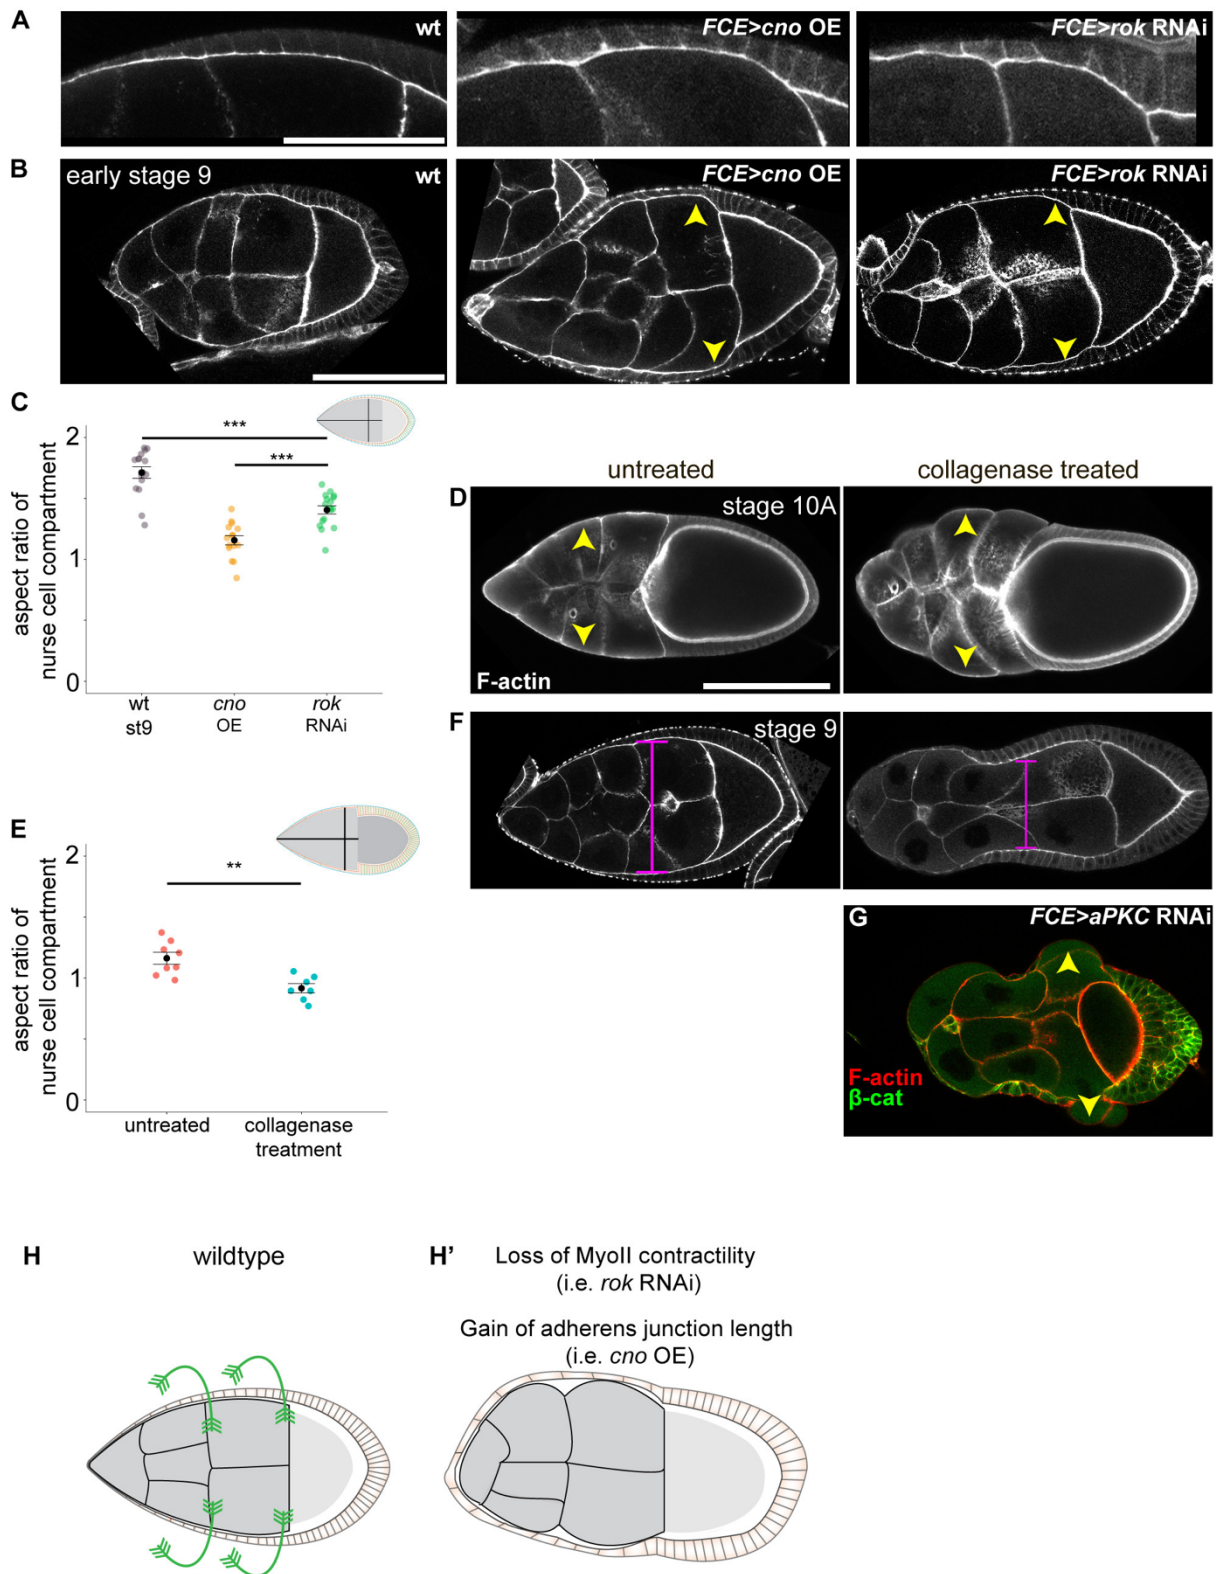

917

918

919

920  
921 **(A)** Bulging of individual nurse cells upon FCE expression of *cno* or *rok* RNAi compared to a  
922 wt egg chamber stained for F-actin and  $\beta$ -cat.  
923 **(B)** Medial sections of stage 9 egg chambers, either wt or with FCE expression of *cno* or *rok*  
924 RNAi stained for F-actin and  $\beta$ -cat. Yellow arrowheads point to nurse cell cluster widening at  
925 NCC positions.  
926 **(C)** Length-to-width aspect ratio of nurse cell compartments (see scheme) for wt egg chambers  
927 or with FCE expression of *cno* or *rok* RNAi at stage 9.  $n \geq 9$  egg chambers for each genotype.  
928 A t-test was performed. \*\*\* indicate  $p\text{-value} \leq 0.001$ .  
929 **(D,F,G)** Medial sections of egg chambers untreated or treated with collagenase at stage 10A  
930 (D) or stage 9 (F,G) stained for F-actin and  $\beta$ -cat. Egg chambers express *vkg-GFP* (*Viking*,  
931 *vkg*, CollagenIV) (D) or *aPKC* RNAi in the epithelium (G). Yellow arrowheads point to nurse  
932 cell bulging upon collagenase treatment (D,G). Magenta lines in F indicate the DV axis width  
933 of the nurse cell compartments.  
934 **(E)** Length-to-width aspect ratio of nurse cell compartments of untreated ( $n=8$ ) and collagenase  
935 treated ( $n=7$ ) stage 10A egg chambers. A t-test was performed. \*\* indicate  $p\text{-value} \leq 0.01$ .  
936 Scale bars (A)=50  $\mu\text{m}$ , (B-G)=100 $\mu\text{m}$   
937 **(H)** Loss of MyoII function or gain of AJ length (H') reduces circumferential constraints imposed  
938 by the apical NCC surface on nurse cell cluster rounding (H).  
939
